# A Language Model Built on Sleep Stage Sequences Enables Efficient Sleep Assessment

Tianyou Yu<sup>1,3†</sup>, Zhenghui Gu<sup>1,3†</sup>, Rui Huang<sup>1</sup>, Fei Wang<sup>9,3</sup>,  
Man Li<sup>1,3</sup>, Jingang Yu<sup>1,3</sup>, Zhuliang Yu<sup>1,3</sup>, Jun Zhang<sup>10,3</sup>,  
Yan Xu<sup>11</sup>, Haiteng Jiang<sup>4,5</sup>, Wenjuan Liu<sup>4,6</sup>, Guifeng Deng<sup>4,6</sup>,  
Zhengrun Gao<sup>7</sup>, Yiwen Wu<sup>8</sup>, Jun Liu<sup>8</sup>, Yu Zhang<sup>12</sup>,  
Matt W Jones<sup>13</sup>, Yuanqing Li<sup>1,3\*</sup>, Jun Xiao<sup>2,3\*</sup>, Wei Wu<sup>7\*</sup>

<sup>1</sup>School of Automation Science and Engineering, South China University of Technology, Guangzhou, 510641, China.

<sup>2</sup>School of Electric Power Engineering, South China University of Technology, Guangzhou, 510641, China.

<sup>3</sup>Pazhou Lab, Guangzhou, 510330, China.

<sup>4</sup>Affiliated Mental Health Center & Hangzhou Seventh People's Hospital and Liangzhu Laboratory, Zhejiang University School of Medicine, Hangzhou, 310058, China.

<sup>5</sup>School of Brain Science and Brain Medicine, MOE Frontier Science Center for Brain Science and Brain-machine Integration, State Key Laboratory of Brain-machine Intelligence, Zhejiang University, Hangzhou, 311121, China.

<sup>6</sup>College of Biomedical Engineering & Instrument Science, Zhejiang University, Hangzhou, 310058, China.

<sup>7</sup>Songjiang Hospital & Songjiang Research Institute, Shanghai Key Laboratory of Emotions and Affective Disorders, Shanghai Jiao Tong University School of Medicine, Shanghai, 201600, China.

<sup>8</sup>Department of Neurology & Institute of Neurology, Ruijin Hospital Affiliated to Shanghai Jiao Tong University School of Medicine, Shanghai, 200025, China.

<sup>9</sup>School of Artificial Intelligence, South China Normal University, Guangzhou, 510631, China.

<sup>10</sup>School of Information Engineering, Guangdong University of Technology, Guangzhou, 510320, China.

<sup>11</sup>Sleep Medicine Center, Department of Psychiatry, Nanfang Hospital Affiliated to Southern Medical University, Guangzhou, 510515, China.

34 <sup>12</sup>Department of Neurology, Songjiang Hospital Affiliated to Shanghai  
35 Jiao Tong University School of Medicine, Shanghai, 201699, China.

36 <sup>13</sup>School of Physiology, Pharmacology & Neuroscience, University of  
37 Bristol, Bristol, BS8 1QU, UK.

38 \*Corresponding author(s). E-mail(s): [ayyqli@scut.edu.cn](mailto:ayyqli@scut.edu.cn);  
39 [junxiao@scut.edu.cn](mailto:junxiao@scut.edu.cn); [weiwuneneuro@sjtu.edu.cn](mailto:weiwuneneuro@sjtu.edu.cn);

40 †These authors contributed equally to this work.

## 41 Abstract

42 Sleep assessment is fundamental to understanding sleep architecture, identify-  
43 ing sleep disorders, and advancing personalized sleep medicine. However, current  
44 clinical sleep assessment methods rely on time-consuming and often costly  
45 procedures, limiting their accessibility and scalability. This study introduces  
46 SleepGPT, the first GPT-based language model for efficient sleep assessment  
47 encompassing both sleep staging and disorder identification. SleepGPT lever-  
48 ages the sequential structure of sleep hypnograms, recognizing strong correlations  
49 between successive sleep stages to extract relevant patterns and transitions. Fol-  
50 lowing self-supervised pretraining on manually annotated large-scale whole-night  
51 hypnograms, SleepGPT yielded consistent performance gains in sleep staging and  
52 disorder diagnosis across five publicly available datasets, with successful blinded  
53 replications on three independent datasets. Notably, experiments on established  
54 sleep staging benchmarks validate SleepGPT as a robust add-on module that  
55 reliably enhances the performance of existing methods. SleepGPT-powered mod-  
56 els furthermore achieved comparable sleep staging accuracy using wearable EEG  
57 and polysomnography (PSG) in a dataset recorded simultaneously with both  
58 modalities. Moreover, a SleepGPT-powered transformer model substantially sur-  
59 passed state-of-the-art performance in classifying abnormal sleep stage sequences  
60 and diagnosing Type-1 narcolepsy. These findings underscore the potential of  
61 SleepGPT-powered models as clinically translatable and scalable artificial intelli-  
62 gence (AI) tools for sleep assessment, opening new avenues to advancing precision  
63 medicine for sleep disorders.

64 **Keywords:** Sleep language model, automated sleep staging, sleep disorder diagnosis,  
65 hypnogram, generative pre-trained transformers

## 66 Introduction

67 Sleep accounts for nearly one-third of the human lifespan and is central to overall  
68 health and well-being. Disrupted sleep patterns are linked to a range of prevalent  
69 disorders, including insomnia, sleep apnea, and narcolepsy, which collectively affect  
70 hundreds of millions worldwide and contribute to serious health issues including

71 hypertension, diabetes, cardiovascular disease, psychiatric disorders, and neurodegen-  
72 erative diseases [1, 2]. Comprehensive sleep assessment, which involves evaluating  
73 sleep stages, duration, and regularity, is foundational to understanding sleep architec-  
74 ture and diagnosing these disorders. The primary method for such assessment, sleep  
75 staging, segments a night’s sleep into specific stages. These stages encompass wakeful-  
76 ness (W), rapid eye movement (REM) sleep, and non-rapid eye movement (NREM)  
77 sleep, which are further segmented into N1, N2, and N3 according to the American  
78 Academy of Sleep Medicine (AASM) standard [3]. Typically, this procedure employs  
79 nocturnal polysomnography (PSG), a composite recording featuring multiple digital  
80 signals encompassing electroencephalography (EEG), electrooculography (EOG), elec-  
81 tromyography (EMG) of the chin and legs, and electrocardiography (ECG), as well  
82 as measures of breathing effort, oxygen saturation, and airflow. Manual sleep stage  
83 labeling from PSG signals may involve visually inspecting each 30-second segment  
84 (epoch) of an entire night’s recording. For an 8-hour sleep study, this translates to over  
85 900 epochs, each requiring meticulous examination of multiple signals in PSG. This  
86 frame-by-frame process is time-consuming and subjective, with inter-scorer reliability  
87 reaching only 82.6% [4–6]. Consequently, there is a strong demand for more efficient  
88 sleep staging.

89 Recent advancements in machine learning (ML), particularly deep learning  
90 (DL), have driven substantial progress in automated sleep staging. Traditional ML  
91 approaches for sleep staging rely on manually engineered features to classify sleep  
92 stages [7, 8]. Capitalizing on the rapid advancements in DL and the increasing acces-  
93 sibility of large sleep datasets, deep neural networks, such as convolutional neural  
94 networks (CNNs)[9–12], recurrent neural networks (RNNs)[13–15], transformers[16,  
95 17], and hybrid networks[18–21], have been proposed for the automated extraction  
96 of features from raw PSG signals, subsequently facilitating sleep stage classification.  
97 These deep neural networks can process either the raw multimodal time series (EEG,  
98 EOG, ECG, EMG, etc.) or time-frequency representations derived from the PSG sig-  
99 nals [22, 23]. Moreover, sleep staging involves a classification of discrete time series,  
100 in which adjacent segments are highly correlated. Common intuition suggests that  
101 models that stage multiple consecutive epochs generally have better performance than  
102 those that stage a single epoch. Hence, RNN models equipped with memory, such  
103 as long short-term memory (LSTM) and gated recurrent unit (GRU) are commonly  
104 employed to exploit contextual information from adjacent epochs [13, 14, 24, 25].

105 Beyond sleep staging, an effective sleep assessment framework must also support  
106 the detection and diagnosis of sleep disorders. Sleep patterns, including the regular-  
107 ity and transitions between stages, are linked to numerous chronic conditions such  
108 as obesity, hypertension, and mental health disorders [2]. Traditional diagnostic pro-  
109 cesses require highly trained sleep specialists to manually analyze and interpret results,  
110 leading to the problem of inter- and intra-operator variability and resource-intensive  
111 procedures. For instance, diagnosing narcolepsy often requires a multiple sleep latency  
112 test (MSLT), a 10-hour test where patients take 4-5 naps spaced 2 hours apart.  
113 During each nap, sleep latency and REM sleep onset are measured. Narcolepsy is  
114 diagnosed if the mean sleep latency is under 8 minutes and at least two naps show

115 REM onset (SOREMPs), or one SOREMP is detected with a short REM latency dur-  
116 ing overnight PSG [26, 27]. Despite these criteria, patients often face a delay of 7-10  
117 years from symptom onset to diagnosis due to symptom misinterpretation and lim-  
118 ited testing access [28]. Automated methods for detecting sleep disorders have been  
119 proposed to increase cost-effectiveness and mitigate inter- and intra-operator variabil-  
120 ity [29]. In particular, traditional ML approaches have been employed for automated  
121 sleep disorder detection using PSG data. However, challenges such as inter-subject  
122 variability, the high dimensionality of PSG data, and limited availability of labeled  
123 instances complicate the training of ML models with robust generalization capabilities.  
124 To address these challenges, various features, such as time and frequency representa-  
125 tions of single-lead or multichannel EEG or ECG signals [30], disorder-specific events  
126 or waveforms [31], and sleep macrostructure statistics [26], have been used to train  
127 classifiers for sleep disorder diagnosis tasks, though with limited success. The lack of  
128 generalization capabilities and the need for extensive feature engineering have hin-  
129 dered the development of robust and accurate sleep disorder diagnostic models. To  
130 date, no study has employed raw sleep stage annotation sequences to diagnose sleep  
131 disorders in an end-to-end manner.

132 A whole-night sleep stage sequence, or hypnogram, obtained through manual anno-  
133 tation or automated models, is crucial for quantifying sleep macrostructure, including  
134 cycles, stage-specific durations, transitions, latency, and efficiency. A typical sleep cycle  
135 progresses from wakefulness through light and deep sleep, culminating in REM, and  
136 repeats approximately 4 to 6 times per night, each lasting around 90 minutes. These  
137 cycles reflect fundamental neurophysiological mechanisms, suggesting strong corre-  
138 lations between consecutive stages and revealing inherent sequential and transition  
139 patterns that can improve the accuracy of sleep staging and disorder diagnosis [32, 33].  
140 For instance, sleep stage transitions have been leveraged for automated sleep staging  
141 using rule-based corrections or data-driven methods like Markov models [8, 32, 34, 35].  
142 Clinically, disorders such as obstructive sleep apnea (OSA) show disruptions in REM-  
143 to-NREM transitions [36], while insomnia patients exhibit increased light sleep and  
144 reduced deep and REM stages. Narcolepsy, in contrast, is marked by short-latency  
145 REM and rapid transitions between wakefulness and REM sleep [26, 37]. These pat-  
146 terns highlight the importance of capturing sequential attributes within sleep stage  
147 sequences for accurate diagnosis.

148 Although sequential attributes have been used to enhance sleep staging, current  
149 methods often depend heavily on specific dataset characteristics and may struggle to  
150 capture long-term dependencies. Notably, the contextual dependencies in sleep stages  
151 resemble those in natural language. Recent advances in language models for biologi-  
152 cal data analysis underscore their potential. For example, scBERT aids in single-cell  
153 RNA-seq cell type annotation [38], Born’s regression transformer supports molecular  
154 modeling [39], and protein language models predict viral evolution, protein structures,  
155 and secondary features [40–42].

156 Inspired by these applications, we introduce SleepGPT, a sleep language model  
157 designed for efficient sleep assessment (Fig. 1). SleepGPT undergoes self-supervised  
158 training on millions of sleep stage annotations, learning to predict the next stage from  
159 preceding ones, similar to GPT models [43, 44]. To our knowledge, this is the first study

160 using a language model to capture the sequential dynamics and transition patterns  
161 within sleep stage sequences. The pretrained SleepGPT model enhances both sleep  
162 staging and disorder diagnosis. Specifically, we approach PSG-based sleep staging as  
163 a speech recognition task, with SleepGPT acting as a language model to refine sleep  
164 stage predictions. Likewise, we frame sleep disorder diagnosis as a text classification  
165 task, using sleep stage sequences as the input. Extensive experiments demonstrate that  
166 SleepGPT serves as an effective plug-and-play module, consistently improving sleep  
167 staging performance and supporting sleep disorder diagnosis. These results suggest  
168 SleepGPT's potential for sleep monitoring and biomarker discovery in sleep disorders  
169 and other CNS-related diseases.

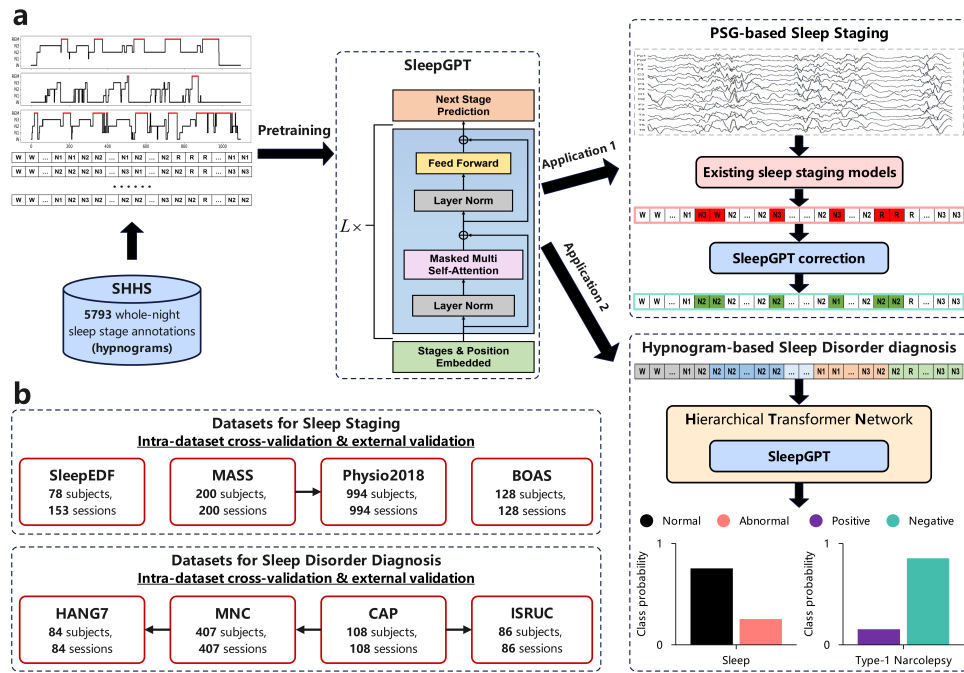

**Fig. 1: Overview of the proposed SleepGPT model and applications to sleep staging enhancement and sleep disorder diagnosis.** (a) The SleepGPT model is pretrained on a large sleep stage annotation dataset SHHS [45] and is used to correct the sleep stage predictions of existing sleep staging models. Moreover, a hierarchical transformer network (HTN) is employed for sleep disorder diagnosis, with SleepGPT acting as a local feature extractor. (b) Datasets for evaluating the proposed artificial intelligence (AI) models. For sleep staging, cross-validation of the AI models is performed on the SleepEDF [46] and MASS [47] datasets. The models trained from the MASS datasets are then externally validated on the Physio2018 [48] dataset for generalizability assessment. Furthermore, the translatability of the SleepGPT model on wearable EEG data is validated on the BOAS [49] dataset with simultaneously collected PSG and headband EEG data. For sleep disorder diagnosis, cross-validation of the AI models is performed on the CAP [50] and MNC [26] datasets. For generalizability assessment, models trained on the CAP dataset for distinguishing normal from abnormal sleep stage sequences are validated externally using the ISRUC [51], MNC, and HANG7 [52] datasets, while those trained on the MNC dataset for distinguishing Type-1 narcolepsy from other hypersomnia and healthy controls are externally validated on the HANG7 dataset.

## 170 Results

### 171 Development of SleepGPT

172 The SleepGPT model, built on the GPT-2 architecture [44], is trained using the  
173 SHHS-1 [45] dataset ( $N = 5793$ ) with a next-stage prediction objective (Fig. **S4**).  
174 Specifically, each subject's sleep stage annotations from SHHS-1 are organized into  
175 30-second sequences ranging from 360 to 1199 stages in length, with an average of  
176 1,012 stages. In total, the dataset comprises 5,863,207 sleep stage annotations.

177 The pretrained SleepGPT model is then evaluated on the sleep staging task  
178 (Fig. **S5**) using the SleepEDF [46] ( $N = 153$ ) and MASS [47] ( $N = 200$ ) datasets.  
179 Concretely, several state-of-the-art sleep staging models are employed to predict sleep  
180 stages from PSG signals, and the predictions with and without SleepGPT corrections  
181 are compared to demonstrate the enhancement enabled by SleepGPT. Both intra-  
182 cohort cross-validation and inter-cohort validation are conducted on the SleepEDF and  
183 MASS datasets to assess the capability of the SleepGPT model in enhancing the per-  
184 formance of existing sleep staging models. Additionally, the Physio2018 [48] dataset  
185 ( $N = 994$ ), along with the YASA toolbox [53] containing pretrained sleep staging  
186 models, are included to blindly (i.e., after the models are finalized and locked) assess  
187 the out-of-sample prediction performance of the models. To assess the translational  
188 utility of SleepGPT, the BOAS [49] dataset ( $N = 128$ ), which includes simultaneous  
189 PSG and wearable EEG recordings, is employed to compare sleep staging performance  
190 between these two modalities.

191 The SleepGPT model is further utilized as a local feature extractor within a hier-  
192 archical transformer network (HTN) for the diagnosis of sleep disorders (Fig. **S6**).  
193 The HTN model is cross-validated on the CAP [50] ( $N = 108$ ) dataset to distinguish  
194 normal from abnormal sleep stage sequences and blindly validated on the ISRUC [51]  
195 dataset ( $N = 86$ ), the MNC [26] dataset ( $N = 407$ ) and the HANG7 [52] dataset  
196 ( $N = 84$ ). To demonstrate its performance on a potentially more challenging task, the  
197 diagnosis of Type-1 narcolepsy (vs. other hypersomnia and healthy controls) is also  
198 performed on the MNC dataset ( $N = 407$ ) via cross-validation and blindly validated  
199 on the HANG7 dataset ( $N = 84$ ). Finally, a visualization example of the learned  
200 global attention weights of HTN is provided to offer insights into the salient patterns  
201 captured by the model.

### 202 Enhancing sleep staging with SleepGPT

203 The performance of the proposed SleepGPT model is assessed in terms of accuracy,  
204 macro-averaging F1-score (MF1), and Cohen's kappa coefficient ( $\kappa$ ) for the sleep stag-  
205 ing task on the SleepEDF [46] and MASS [47] datasets. Among these performance  
206 metrics, accuracy indicates the proportion of correctly classified sleep stages, while  
207 MF1 ensures that performance is balanced across all classes, addressing the impact  
208 of class imbalance [54]. Cohen's Kappa ( $\kappa$ ) adjusts for chance agreement, providing  
209 a more robust assessment of model performance, especially in multi-class classifica-  
210 tion [55]. Table 1 presents the results of the proposed methods alongside those of  
211 contemporary state-of-the-art methodologies, with the referenced ones directly sourced

212 from the original publications. Despite its simple design (Fig. **S7**), TinySleepNet [12]  
213 attains competitive performance across both datasets. Moreover, by integrating infor-  
214 mation from preceding EEG epochs, TinySleepNet outperforms its non-sequential  
215 version (i.e., without an LSTM module), TinySleepNet-nonseq. This improvement  
216 stems from the ability of the LSTM layer to capture the sequential attributes of  
217 EEG data, a feature leveraged by most advanced sleep staging models. Improvement  
218 is also observed between the multi-view architecture-based XSleepNet models with  
219 and without an LSTM sequential module [23], highlighting the importance of cap-  
220 turing sleep stage sequences to enhance sleep staging performance. The integration  
221 of SleepGPT improves the accuracy of TinySleepNet-nonseq by 2.1% and 1.5%, and  
222 that of XSleepNet-nonseq (non-sequential version of XSleepNet) by 2.5% and 1.3%,  
223 on the SleepEDF and MASS datasets, respectively. Notably, the performance of the  
224 non-sequential models on the SleepEDF dataset approaches that of their sequential  
225 counterparts, i.e., TinySleepNet and XSleepNet. This demonstrates the ability of the  
226 SleepGPT model to capture the sequential characteristics of sleep stages, compen-  
227 sating for the limitations of the non-sequential models in encoding the contextual  
228 information of EEG signals. Importantly, the staging accuracy of TinySleepNet with  
229 SleepGPT exhibits improvements of 0.5% and 0.6% on the SleepEDF and MASS  
230 datasets, respectively. The incorporation of SleepGPT further enhances the accuracy  
231 of XSleepNet by 0.6% and 0.4% on the SleepEDF and MASS datasets, respectively.  
232 These results underscore the effectiveness of the SleepGPT model in enhancing the  
233 performance of state-of-the-art sleep staging models, even those already equipped with  
234 sequential modules.

235 A visualization of the enhancement in sleep staging performance by SleepGPT is  
236 provided in Fig. **S2**, which illustrates the hypnograms of a representative subject from  
237 the SleepEDF and MASS datasets. It demonstrates that the context-aware nature  
238 of SleepGPT corrects the predicted sleep stages produced by sleep staging models,  
239 particularly for non-sequential models, resulting in a hypnogram more consistent with  
240 the ground truth.

241 The improvements in MF1 and  $\kappa$  scores further validate the robustness of the  
242 SleepGPT model in enhancing the performance of existing sleep staging models. Sleep-  
243 GPT significantly enhances the XSleepNet model and achieves the highest MF1 score  
244 of 78.7% and 81.5%, and  $\kappa$  score of 0.781 and 0.797 on the SleepEDF and MASS  
245 datasets, respectively. Additionally, the sleep stage-specific results demonstrate that  
246 the SleepGPT-powered models perform favorably on the hard-to-classify sleep stages,  
247 such as N1 and REM, which existing models are more prone to misclassifying.

## 248 **Testing generalization of the sleep staging models**

249 To evaluate the out-of-sample generalizability of SleepGPT for sleep staging, we  
250 applied the sleep staging models trained on the MASS dataset to the Physio2018  
251 dataset [48], which contains 994 PSG recordings. We aimed to assess whether Sleep-  
252 GPT could similarly enhance sleep staging performance in an independent dataset,  
253 as observed in the cross-validation experiments. The MASS dataset was chosen for  
254 training due to its identical EEG channel configurations (C3-A2/C4-A1) to those in  
255 the Physio2018 dataset, ensuring consistent input features in the PSG recordings.



**Table 1:** Performance of state-of-the-art sleep staging methods and the proposed SleepGPT-powered models on the SleepEDF and MASS datasets. The best results are highlighted in bold, and the results with the SleepGPT-powered models are gray-shaded. **SleepGPT:** with (w) or without (w/o) SleepGPT, **ACC:** accuracy (%), **MF1:** macro-averaging F1-score (%), **kappa:** Cohen’s kappa coefficient. **W**, **N1**, **N2**, **N3** and **REM:** sleep stage-specific accuracies (%). **TinySleepNet-Nonseq:** TinySleepNet without an LSTM module. **XSleepNet-Nonseq:** XSleepNet without an LSTM module.

| Dataset  | Method              | SleepGPT | ACC         | MF1         | kappa        | W           | N1          | N2          | N3          | REM         |
|----------|---------------------|----------|-------------|-------------|--------------|-------------|-------------|-------------|-------------|-------------|
| SleepEDF | DeepSleepNet [9]    | w/o      | 77.8        | 71.8        | 0.700        | 90.8        | 44.8        | 78.5        | 67.9        | 71.3        |
|          | SleepEEGNet [11]    | w/o      | 80.0        | 73.6        | 0.730        | 91.7        | 44.1        | 82.5        | 73.5        | 76.1        |
|          | AttnSleepNet [20]   | w/o      | 81.3        | 75.1        | 0.740        | 92.0        | 42.0        | 85.0        | <b>82.1</b> | 74.2        |
|          | SeqSleepNet [14]    | w/o      | 82.6        | 76.4        | 0.760        | -           | -           | -           | -           | -           |
|          | TinySleepNet-Nonseq | w/o      | 80.5        | 71.9        | 0.727        | 93.7        | 29.1        | 87.6        | 70.1        | 74.1        |
|          |                     | w        | 82.6        | 74.3        | 0.755        | <b>94.7</b> | 30.2        | <b>91.4</b> | 73.0        | 74.8        |
|          | TinySleepNet [12]   | w/o      | 83.1        | 76.9        | 0.764        | 93.3        | 41.6        | 87.9        | 76.8        | 80.5        |
|          |                     | w        | 83.6        | 77.6        | 0.772        | 93.6        | 44.2        | 88.1        | 77.1        | 81.1        |
|          | XSleepNet-Nonseq    | w/o      | 80.3        | 72.7        | 0.725        | 90.4        | 31.8        | 88.5        | 70.9        | 76.6        |
|          |                     | w        | 82.8        | 76.3        | 0.761        | 93.3        | 40.7        | 88.5        | 72.0        | 80.4        |
|          | XSleepNet [23]      | w/o      | 83.7        | 77.9        | 0.774        | 93.6        | 45.0        | 87.7        | 78.6        | 81.4        |
|          |                     | w        | <b>84.3</b> | <b>78.7</b> | <b>0.781</b> | 93.7        | <b>47.2</b> | 88.3        | 79.3        | <b>81.5</b> |
| MASS     | DeepSleepNet [9]    | w/o      | 83.9        | 78.9        | 0.769        | 86.3        | 53.9        | 88.2        | 79.6        | 86.8        |
|          | IITNet* [24]        | w/o      | 86.3        | 80.5        | 0.790        | 85.4        | 54.1        | 91.3        | 86.8        | 84.8        |
|          | TinySleepNet-Nonseq | w/o      | 81.7        | 74.3        | 0.736        | 86.5        | 29.4        | 89.4        | 79.1        | 84.5        |
|          |                     | w        | 83.2        | 76.0        | 0.756        | 87.0        | 30.2        | <b>91.8</b> | 78.7        | 86.2        |
|          | TinySleepNet [12]   | w/o      | 84.2        | 79.7        | 0.774        | 87.5        | 51.5        | 89.2        | 82.4        | 85.2        |
|          |                     | w        | 84.8        | 80.2        | 0.784        | 87.9        | 53.1        | 89.5        | <b>84.5</b> | 85.6        |
|          | XSleepNet-Nonseq    | w/o      | 82.1        | 75.1        | 0.742        | 86.7        | 32.3        | 89.7        | 79.5        | 83.7        |
|          |                     | w        | 83.4        | 77.0        | 0.761        | 88.3        | 36.6        | 90.6        | 80.9        | 84.5        |
|          | XSleepNet [23]      | w/o      | 85.3        | 80.8        | 0.791        | <b>88.9</b> | 53.8        | 90.1        | 83.3        | 86.5        |
|          |                     | w        | <b>85.7</b> | <b>81.5</b> | <b>0.797</b> | 88.7        | <b>56.1</b> | 90.2        | 83.7        | <b>87.3</b> |

\* the results are not directly comparable since they were evaluated on the SS3 subset with 62 healthy subjects in the MASS dataset.

256 To confirm the performance improvements were bidirectional after the generalization  
257 assessment of the MASS models was completed, we also reversed the process by apply-  
258 ing the sleep staging models trained on the Physio2018 dataset to the MASS dataset.  
259 As an additional part of out-of-sample validation, YASA (Yet Another Spindle Algo-  
260 rithm) [53], an open-source sleep analysis toolbox with pretrained sleep staging models,  
261 was also applied to stage the sleep EEG data from the SleepEDF and MASS datasets.  
262 SleepGPT was assessed to determine whether it could improve the performance of this  
263 established sleep staging tool.

264 The results, shown in Table 2 and Fig. S1, indicate that SleepGPT consistently  
265 enhances the performance of YASA, TinySleepNet, and XSleepNet across all three  
266 datasets. Specifically, it improves YASA’s accuracy on the SleepEDF and MASS  
267 datasets by 4.2% and 1.6%, respectively. Furthermore, integrating SleepGPT enhances  
268 the accuracy of TinySleepNet by 2.9% and 1.6%, and that of XSleepNet by 2.3% and  
269 1.9%, during cross-dataset validation between the Physio2018 and MASS datasets.  
270 Consistent improvements in MF1,  $\kappa$ , and stage-specific accuracies are also observed.  
271 Notably, models trained on the larger Physio2018 dataset ( $N = 994$ ) and tested on the

**Table 2:** Results of three state-of-the-art staging methods with and without SleepGPT when performing cross-dataset sleep staging on the SleepEDF, MASS, and Physio2018 datasets. **Dataset: Source**  $\rightarrow$  **Target** indicate that the staging model is trained from the **Source** dataset and evaluated on the **Target** dataset. **SleepGPT**: with or without SleepGPT, **ACC**: accuracy (%), **MF1**: macro-averaging F1-score (%), **kappa**: Cohen’s kappa coefficient. **W**, **N1**, **N2**, **N3** and **REM**: sleep stage-specific accuracies (%).

| Method       | Dataset                       | SleepGPT | ACC  | MF1  | kappa | W    | N1   | N2   | N3   | REM  |
|--------------|-------------------------------|----------|------|------|-------|------|------|------|------|------|
| YASA         | YASA $\rightarrow$ SleepEDF   | w/o      | 72.7 | 63.3 | 0.611 | 92.6 | 13.2 | 73.9 | 73.2 | 64.9 |
|              |                               | w        | 76.9 | 68.2 | 0.677 | 89.1 | 20.2 | 81.3 | 81.4 | 76.8 |
|              | YASA $\rightarrow$ MASS       | w/o      | 78.6 | 71.2 | 0.700 | 92.8 | 21.7 | 82.0 | 91.6 | 84.3 |
|              |                               | w        | 80.2 | 73.6 | 0.724 | 95.4 | 26.1 | 82.3 | 94.0 | 86.5 |
|              | YASA $\rightarrow$ Physio2018 | w/o      | 71.4 | 66.2 | 0.613 | 92.5 | 20.5 | 77.3 | 78.1 | 77.4 |
|              |                               | w        | 73.5 | 68.6 | 0.640 | 93.6 | 22.8 | 80.7 | 79.3 | 77.7 |
| TinySleepNet | Physio2018 $\rightarrow$ MASS | w/o      | 74.1 | 67.1 | 0.617 | 66.1 | 27.4 | 89.2 | 74.1 | 69.6 |
|              |                               | w        | 77.0 | 71.3 | 0.665 | 66.2 | 39.1 | 90.1 | 82.9 | 71.8 |
|              | MASS $\rightarrow$ Physio2018 | w/o      | 70.5 | 66.3 | 0.600 | 94.7 | 35.0 | 75.9 | 48.6 | 81.6 |
|              |                               | w        | 72.1 | 68.0 | 0.621 | 95.1 | 36.4 | 78.2 | 51.3 | 81.8 |
| XSleepNet    | Physio2018 $\rightarrow$ MASS | w/o      | 74.4 | 68.5 | 0.626 | 64.3 | 39.1 | 88.6 | 83.0 | 61.4 |
|              |                               | w        | 76.7 | 71.3 | 0.661 | 68.8 | 43.0 | 90.0 | 86.5 | 62.0 |
|              | MASS $\rightarrow$ Physio2018 | w/o      | 70.3 | 65.8 | 0.594 | 94.2 | 41.8 | 77.1 | 38.8 | 77.0 |
|              |                               | w        | 72.2 | 67.4 | 0.617 | 95.0 | 42.9 | 80.6 | 39.0 | 77.8 |

272 smaller MASS dataset ( $N = 200$ ) demonstrated superior staging performance than the  
273 reverse, suggesting that the size and composition of the training dataset, particularly  
274 the distribution of sleep stages, have a considerable impact on model generalizability. A  
275 visualization example of the correction made by SleepGPT during cross-dataset valida-  
276 tion is provided in Fig. S3. These findings validate the generalizability and robustness  
277 of SleepGPT, as it reliably improves the out-of-sample prediction performance of  
278 existing sleep staging models across diverse datasets.

### 279 Assessing translatability of the SleepGPT-powered models on 280 wearable EEG data

281 Advances in wearable devices offer new possibilities for at-home sleep assessment,  
282 including sleep staging. To assess the translational potential of the SleepGPT-powered  
283 models, we evaluated their sleep staging performance using the BOAS dataset [49],  
284 which includes simultaneously recorded PSG and headband EEG data of 128 sub-  
285 jects. The TinySleepNet and XSleepNet models, with and without SleepGPT, were  
286 cross-validated on the PSG and the headband EEG data, respectively. As detailed in  
287 Table 3, the results show that both the TinySleepNet and XSleepNet models exhibit  
288 comparable performance across the PSG and headband EEG data. Importantly, the  
289 SleepGPT-powered models consistently enhanced the performance of both models,  
290 leading to improvements in accuracy, MF1,  $\kappa$  scores, and stage-specific accuracies  
291 across both datasets. Notably, the sleepGPT-powered XSleepNet model achieved the  
292 highest accuracy of 84.3% and 83.9% for the PSG and headband EEG data, respec-  
293 tively. The results underscore the robustness of the SleepGPT models in enhancing

294 sleep staging performance across different EEG modalities and support their potential  
 295 for integration into wearable sleep monitoring applications, enabling adoption of low-  
 296 burden, low-cost, longitudinal sleep monitoring without significantly compromising  
 297 accuracy.

**Table 3:** Performance of state-of-the-art sleep staging methods and the proposed SleepGPT-powered models on the BOAS wearable dataset. The best results are highlighted in bold, while the results with the SleepGPT-powered model are gray-shaded. **SleepGPT**: with (w) or without (w/o) SleepGPT, **ACC**: accuracy (%), **MF1**: macro-averaging F1-score (%), **kappa**: Cohen’s kappa coefficient. **W**, **N1**, **N2**, **N3** and **REM**: sleep stage-specific accuracies (%).

| Dataset  | Method       | SleepGPT | ACC         | MF1         | kappa        | W           | N1          | N2          | N3          | REM         |
|----------|--------------|----------|-------------|-------------|--------------|-------------|-------------|-------------|-------------|-------------|
| PSG      | TinySleepNet | w/o      | 80.9        | 64.1        | 0.660        | 78.0        | 20.8        | 90.8        | 48.0        | 69.4        |
|          |              | w        | 81.6        | 65.6        | 0.673        | 78.4        | 23.1        | <b>91.2</b> | 51.1        | 70.5        |
|          | XSleepNet    | w/o      | 83.4        | 68.8        | 0.715        | 88.7        | 27.0        | 88.2        | 53.9        | 81.1        |
|          |              | w        | <b>84.3</b> | <b>70.4</b> | <b>0.728</b> | <b>89.0</b> | <b>27.9</b> | 89.2        | <b>56.3</b> | <b>81.7</b> |
| Headband | TinySleepNet | w/o      | 80.7        | 62.5        | 0.652        | 78.5        | 18.3        | 91.1        | 39.5        | 68.8        |
|          |              | w        | 81.3        | 64.5        | 0.667        | 79.5        | 20.8        | 91.0        | <b>48.0</b> | 69.4        |
|          | XSleepNet    | w/o      | 83.0        | 65.7        | 0.694        | 84.7        | 23.9        | 91.8        | 36.8        | 73.4        |
|          |              | w        | <b>83.9</b> | <b>67.8</b> | <b>0.712</b> | <b>87.0</b> | <b>26.9</b> | <b>91.9</b> | 43.8        | <b>74.5</b> |

## 298 Sleep disorder diagnosis with SleepGPT

299 We next assessed the capability of SleepGPT as a feature extractor for sleep disorder  
 300 diagnosis compared to existing state-of-the-art methods. Performance was evaluated  
 301 using balanced classification accuracy (BACC), sensitivity, and specificity across the  
 302 modified CAP [50] and MNC [26] datasets. Table 4 presents the results for two empir-  
 303 ical feature-based XGBoost classifiers—Hypnogram [53] and Hypnodensity [26]—as  
 304 well as a baseline end-to-end neural network (BaseNet; Fig. S8), the proposed hier-  
 305 archical transformer network (HTN) trained from scratch, and the HTN model  
 306 incorporating pretrained SleepGPT parameters. The receiver operating characteristic  
 307 (ROC) curves of each method across the CAP and MNC datasets are also shown in  
 308 Fig. 2 to provide a detailed breakdown of the results (Also see Fig. S9 for the confusion  
 309 matrix of each method).

310 On the CAP dataset, in which the task was to distinguish between normal sleep  
 311 and abnormal sleep (including sleep disorders such as insomnia, disordered breathing,  
 312 narcolepsy, etc.), the XGBoost classifier trained with hypnogram features achieved a  
 313 balanced accuracy of 90.91%, with a sensitivity of 95.65% and a specificity of 86.17%  
 314 <sup>1</sup>. While end-to-end models like BaseNet can learn useful features from hypnograms,  
 315 they may struggle to capture the sequential attributes of sleep stages if the model  
 316 architecture is not carefully designed, as evidenced by a balanced accuracy of 84.97%,  
 317 with a sensitivity of 86.96% and a specificity of 82.98%. The SleepGPT-based HTN

<sup>1</sup>Hypnodensity-based XGBoost results were unavailable due to the absence of hypnodensity data for the CAP dataset.

318 model, however, significantly improved performance in an end-to-end fashion. This  
 319 highlights the HTN’s capacity to grasp both localized sequential sleep transitions and  
 320 broader contextual patterns in sleep hypnograms, enhancing diagnostic performance.  
 321 Notably, initializing the HTN with pretrained SleepGPT parameters yielded the high-  
 322 est performance, achieving a balanced accuracy of 96.27%, with a sensitivity of 98.91%  
 323 and a specificity of 93.62%. This pretrained HTN demonstrated a marked improve-  
 324 ment in sensitivity over its non-pretrained counterpart, with an increase of over 10%  
 325 on the CAP dataset.

326 Similar trends were observed in the MNC dataset, which involved distinguish-  
 327 ing Type-1 narcolepsy (T1N) patients from non-T1N individuals (including other  
 328 hypersomnia patients and healthy controls), an arguably more challenging task than  
 329 distinguishing general sleep-disorder patients from health controls. The XGBoost clas-  
 330 sifier trained on hypnogram and hypnodensity features achieved balanced accuracies of  
 331 84.39% and 85.16%, respectively. Although the BaseNet model performed reasonably  
 332 well in diagnosing T1N patients, achieving a balanced accuracy of 79.69%, it struggled  
 333 with sensitivity, identifying only 67.07% of T1N subjects. The HTN model trained  
 334 from scratch produced a balanced accuracy of 85.49%, a sensitivity of 78.05%, and a  
 335 specificity of 92.92%, matching the performance of the XGBoost classifier trained on  
 336 hypnodensity features. When fine-tuned with pretrained SleepGPT parameters, the  
 337 HTN model further boosted performance, achieving a balanced accuracy of 92.81%, a  
 338 sensitivity of 91.46%, and a specificity of 94.15%. This improvement underscores the  
 339 benefits of the SleepGPT model’s self-supervised pretraining on large-scale sleep stage  
 340 datasets. Importantly, the pretrained SleepGPT model demonstrated the potential for  
 341 fine-tuning on smaller datasets, which is crucial in sleep medicine, where data scarcity  
 342 often presents a challenge.

**Table 4:** Performance of the proposed SleepGPT model on the sleep disorder diagnosis task. All results are reported in terms of balanced accuracy (**BACC**) (%), sensitivity (**SENS**) (%), and specificity (**SPEC**) (%). **Hypnogram** and **Hypnodensity**: two empirical feature-based XGBoost classifiers; **BaseNet**: a baseline neural network; **From scratch**: the proposed hierarchical transformer network (HTN) trained from scratch; **Pretrained**: the HTN model incorporating pretrained SleepGPT parameters.

| Method            | CAP (normal vs. abnormal) |              |              | MNC (T1N vs. others) |              |              |
|-------------------|---------------------------|--------------|--------------|----------------------|--------------|--------------|
|                   | BACC                      | SENS         | SPEC         | BACC                 | SENS         | SPEC         |
| Hypnogram [53]    | 90.91                     | 95.65        | 86.17        | 84.39                | 82.93        | 85.85        |
| Hypnodensity [26] | -                         | -            | -            | 85.16                | 81.71        | 88.62        |
| BaseNet           | 84.97                     | 86.96        | 82.98        | 79.69                | 67.07        | 92.31        |
| From scratch      | 89.77                     | 88.04        | 91.49        | 85.49                | 78.05        | 92.92        |
| Pretrained        | <b>96.27</b>              | <b>98.91</b> | <b>93.62</b> | <b>92.81</b>         | <b>91.46</b> | <b>94.15</b> |

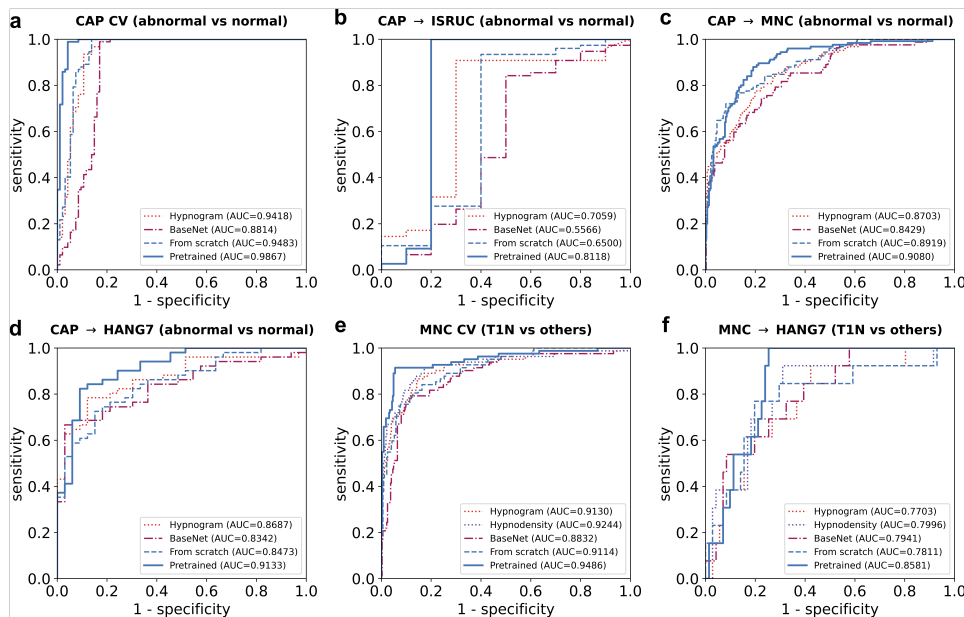

**Fig. 2:** Receiver operating characteristic (ROC) curves for the proposed SleepGPT-powered models and baseline methods in sleep disorder diagnosis on the CAP, ISRUC, MNC, and HANG7 datasets are presented. The area under the ROC curve (AUC) for each method is provided in the legend. The curves depict the performance of distinguishing between abnormal and normal sleep: (a) cross-validated (CV) on the CAP dataset, (b) blindly validated on the ISRUC dataset, (c) blindly validated on the MNC dataset, and (d) blindly validated on the HANG7 dataset. Additionally, they include distinguishing Type-1 narcolepsy (T1N) from others: (e) cross-validated (CV) on the MNC dataset, and (f) blindly validated on the HANG7 dataset. **Hypnogram** and **Hypnodensity**: two empirical feature-based XGBoost classifiers; **BaseNet**: a baseline neural network; **From scratch**: the proposed hierarchical transformer network (HTN) trained from scratch; **Pretrained**: the HTN model incorporating pretrained SleepGPT parameters.

### 343 Testing generalization of the sleep disorder diagnosis models

344 We assessed the out-of-sample generalizability of SleepGPT in diagnosing abnormal  
 345 sleep by evaluating the prediction performance of the models trained from the  
 346 CAP dataset on the ISRUC [51], MNC [26], and HANG7 [52] dataset. The ISRUC  
 347 sleep dataset contains whole-night PSG recordings of obstructive sleep apnea (OSA)  
 348 patients ( $N = 76$ ) and healthy controls ( $N = 10$ ). As shown in Table 5, on this unseen  
 349 dataset, the pretrained HTN model achieved a balanced accuracy of 90.00%, with  
 350 a sensitivity of 100% and a specificity of 80.00% when distinguishing OSA patients  
 351 from healthy controls. The model also demonstrated strong performance on the MNC  
 352 dataset, achieving a balanced accuracy of 83.72%, with a sensitivity of 88.00% and  
 353 a specificity of 79.43% in discriminating healthy controls ( $N = 282$ ) from patients with

354 T1N or other hypersomnia ( $N = 125$ ). On the HANG7 dataset, which contains 51  
355 patients with narcolepsy and 33 healthy controls, the HTN model achieved a balanced  
356 accuracy of 84.05%, with a sensitivity of 86.27% and a specificity of 81.82%.

357 For the more challenging task of differentiating T1N patients from other hyper-  
358 somnia patients and healthy controls, the HTN model trained on the MNC dataset  
359 was externally validated using the HANG7 dataset. As shown in Table 6, the HTN  
360 model fine-tuned with SleepGPT parameters achieved a balanced accuracy of 84.18%,  
361 with a sensitivity of 92.31% and a specificity of 76.06%, outperforming the compared  
362 methods.

363 The ROC curves of each method across the generalization datasets are shown in  
364 Fig. 2. These results significantly outperform the compared methods, demonstrat-  
365 ing the robustness and generalizability of the SleepGPT model in diagnosing sleep  
366 disorders.

**Table 5:** Generalization performance on the ISRUC [51], MNC [26], and HANG7 dataset [52] with model trained from the CAP [50] dataset when classifying abnormal vs normal sleep. All results are reported in terms of balanced accuracy (**BACC**) (%), sensitivity (**SENSI**) (%), and specificity (**SPECI**) (%). **Hypnogram** and **Hypnodensity**: two empirical feature-based XGBoost classifiers; **BaseNet**: a baseline neural network; **From scratch**: the proposed hierarchical transformer network (HTN) trained from scratch; **Pretrained**: the HTN model incorporating pretrained SleepGPT parameters.

| Method         | CAP → ISRUC  |               |              | CAP → MNC    |              |              | CAP → HANG7  |              |              |
|----------------|--------------|---------------|--------------|--------------|--------------|--------------|--------------|--------------|--------------|
|                | BACC         | SENSI         | SPECI        | BACC         | SENSI        | SPECI        | BACC         | SENSI        | SPECI        |
| Hypnogram [53] | 80.39        | 90.79         | 70.00        | 77.72        | 82.40        | 73.05        | 79.59        | 80.39        | 78.79        |
| BaseNet        | 67.11        | 84.21         | 50.00        | 74.92        | 67.07        | <b>82.77</b> | 72.99        | 82.35        | 63.64        |
| From scratch   | 76.71        | 93.42         | 60.00        | 79.94        | 84.00        | 75.89        | 76.65        | 74.51        | 78.79        |
| Pretrained     | <b>90.00</b> | <b>100.00</b> | <b>80.00</b> | <b>83.72</b> | <b>88.00</b> | 79.43        | <b>84.05</b> | <b>86.27</b> | <b>81.82</b> |

## 367 Visualization of the SleepGPT-powered sleep disorder 368 diagnosis model

369 To provide insights into the global feature extractor of the HTN model, a visualiza-  
370 tion of the attention weights from the global feature extractor on the CAP dataset  
371 is presented in Fig. 3 for one healthy subject and five subjects with distinct sleep  
372 disorders—insomnia, narcolepsy, nocturnal frontal lobe epilepsy (NFLE), periodic leg  
373 movements (PLMs), and REM behavior disorder (RBD). By focusing on the attention  
374 weights assigned to the *CLS* token (a special token that outputs a global repre-  
375 sentation of the entire sequence, detailed in the [Methods](#) section) within the final  
376 transformer layer, we can observe how each model identifies and prioritizes salient  
377 features in the data. The results clearly demonstrate the effectiveness of the global  
378 feature extractor in capturing atypical sleep patterns associated with sleep disorders.  
379 For instance, in the case of the insomnia subject, characterized by small N3 and REM

**Table 6:** Generalization performance on the HANG7 dataset [52] with model trained from the MNC [26] dataset when classifying Type-1 narcolepsy (T1N) vs others. All results are reported in terms of balanced accuracy (**BACC**) (%), sensitivity (**SENSI**) (%), and specificity (**SPECI**) (%). **Hypnogram** and **Hypnodensity**: two empirical feature-based XGBoost classifiers; **BaseNet**: a baseline neural network; **From scratch**: the proposed hierarchical transformer network (HTN) trained from scratch; **Pretrained**: the HTN model incorporating pretrained SleepGPT parameters.

| Method            | MNC $\rightarrow$ HANG7 |              |              |
|-------------------|-------------------------|--------------|--------------|
|                   | BACC                    | SENSI        | SPECI        |
| Hypnogram [53]    | 72.32                   | 61.54        | <b>83.10</b> |
| Hypnodensity [26] | 75.46                   | 69.23        | 81.69        |
| BaseNet           | 69.12                   | 69.23        | 69.01        |
| From scratch      | 75.08                   | 76.92        | 73.24        |
| Pretrained        | <b>84.18</b>            | <b>92.31</b> | 76.06        |

380 sleep ratios and direct transitions from REM sleep to wakefulness, the global fea-  
381 ture extractor allocates more attention to the segments marked by these transitions  
382 (Fig. 3b). Likewise, the global transformer encoder of HTN highlights segments with  
383 short wake-to-REM sleep latency or abrupt transitions from wakefulness to REM sleep  
384 for the narcolepsy subject (Fig. 3c). Furthermore, the self-attention module identifies  
385 segments featuring abnormal stage transitions, short N3 and REM sleep durations,  
386 direct shifts from REM sleep to wakefulness, and frequent toggling between deep (N3)  
387 or REM sleep and wakefulness (Fig. 3d-f). Conversely, for subjects without patholo-  
388 gies, the attention weights are more evenly dispersed across the hypnogram segments  
389 (Fig. 3a). The above abnormal patterns in sleep stage sequences are indicative of sleep  
390 disorders and may serve as potential biomarkers for sleep disorder diagnosis.

391 We also show the attention weights obtained by the global feature extractor of  
392 the HTN model on the MNC dataset in Fig. 4 for a healthy control, a hypersomnia  
393 patient, and a T1N patient. The attention weights are more evenly distributed across  
394 the hypnogram segments for the healthy control, while for the narcolepsy patient, there  
395 is heightened attention to segments featuring short wake-to-REM latency or direct  
396 transitions from wakefulness to REM sleep. Since we are classifying T1N patients  
397 from other hypersomnia patients and healthy controls, the attention weights are  
398 more focused on segments similar to those of the narcolepsy patient. These segments  
399 include short wake-to-REM latency, direct transitions from wakefulness to REM sleep,  
400 and dissociated REM sleep. The self-attention module of the HTN model effectively  
401 identifies the most discriminative sleep patterns, thereby enhancing the classification  
402 performance for T1N.

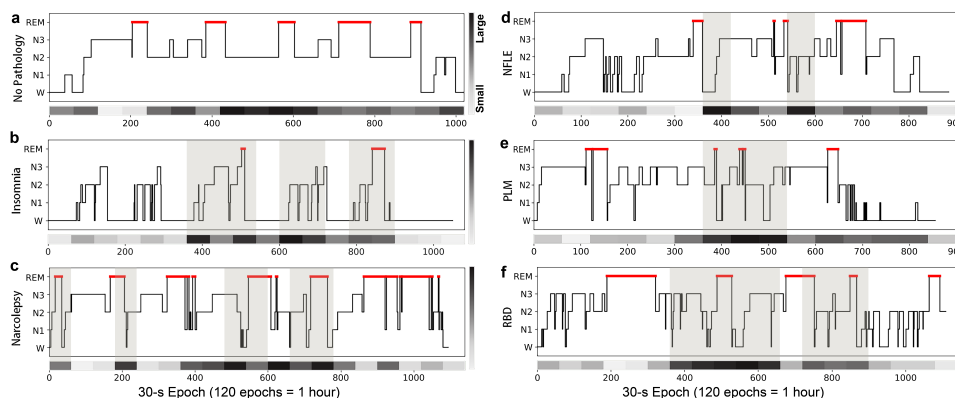

**Fig. 3:** Visualization of the learned attention weights of the global transformer encoder on the CAP dataset for sleep disorder diagnosis (abnormal vs. normal). (a) The attention weights are more evenly distributed among the segments of the sleep hypnogram for a healthy subject. (b) There is a small N3 and REM sleep ratio and direct transitions from REM sleep to wakefulness for the insomnia subject. (c) Segments with short REM sleep latency or direct transitions into REM sleep from wakefulness are highlighted by the global transformer encoder of the HTN for the narcolepsy subject. (d-f) Segments with abnormal stage transitions, such as short N3 and REM sleep duration, a direct transition from REM sleep to wakefulness, and frequent switches between deep sleep, i.e., N3 and REM sleep, and wakefulness, are identified by the self-attention module for the subjects with NFLE, PLMs, and RBD, respectively. The gray-shaded areas highlight the segments with abnormal sleep patterns.

## 403 Discussion

404 This study introduces SleepGPT, a novel sleep language model adapted from the GPT  
405 architecture and trained in a self-supervised manner on a comprehensive sleep stage  
406 dataset. This effort parallels recent advances in biological sequence modeling, as seen  
407 in studies using transformer-based models for protein folding [40–42] and cell type  
408 annotation [38], and expands these applications into the domain of sleep medicine.  
409 SleepGPT offers several advantages for efficient sleep assessment: it consistently  
410 enhances existing sleep staging methods, effectively captures sleep stage transition  
411 dynamics, and integrates as a feature extractor within hierarchical transformer net-  
412 works to improve sleep disorder diagnosis. Additionally, it identifies interpretable  
413 abnormal sleep patterns, potentially providing mechanistic insights into sleep dis-  
414 orders. Taken together, these findings highlight SleepGPT’s potential as a scalable,  
415 clinically translatable artificial intelligence (AI)-powered solution for automated sleep  
416 assessment.

417 The integration of SleepGPT consistently enhances sleep staging performance,  
418 although the degree of improvement varies across models and datasets. Notably, mod-  
419 els lacking memory mechanisms, which fail to utilize contextual information from



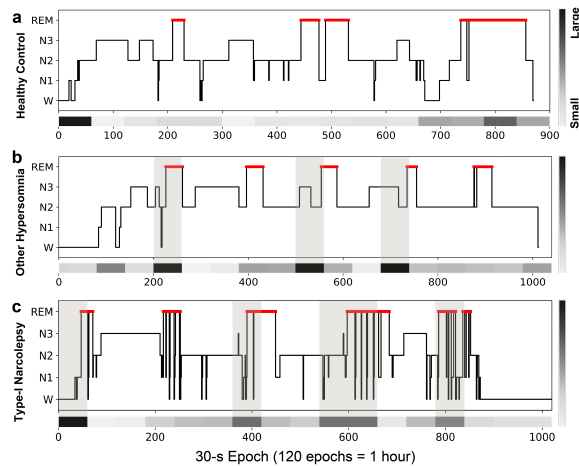

**Fig. 4:** Visualization of the learned attention weights of the global transformer encoder on the MNC dataset for sleep disorder diagnosis (Type-1 narcolepsy vs. (other hypersomnia + healthy control)). (a) The attention weights are more evenly distributed among the segments of the sleep hypnogram for a healthy subject. (b) The attention weights for a hypersomnia subject focus on deep sleep stages (N3) in the late half of sleep. (c) Segments with abnormal stage transitions, such as short REM sleep latency, and dissociated REM sleep, are identified by the self-attention module for the narcolepsy subject. The gray-shaded areas highlight the segments with the most discriminative sleep patterns.

420 physiological signals and sleep stages, exhibit more substantial improvement. In com-  
421 parison, models with sequential components like LSTMs show more moderate, likely  
422 due to their inherent ability to capture temporal dependencies in sleep-related data,  
423 but still consistent gains. SleepGPT contributes to the sleep staging task by leverag-  
424 ing its understanding of natural sequential dependencies between sleep stages, learned  
425 through pretraining on large hypnogram datasets. This contextual correction layer  
426 enables SleepGPT to refine predictions from existing staging models, adjusting mis-  
427 classifications based on surrounding stages. For example, if a model misclassifies a  
428 REM stage as wakefulness, SleepGPT can reclassify it by recognizing that the sequence  
429 context supports a REM classification. Additionally, SleepGPT's attention mecha-  
430 nisms focus on critical stage transitions, identifying inconsistent patterns, such as  
431 abrupt shifts from deep sleep (N3) directly to wakefulness, that may signal staging  
432 errors. The benefits of SleepGPT are particularly pronounced in blinded evaluations  
433 on independent datasets, where data heterogeneity often hinders the generalizability  
434 of sleep staging models. By effectively capturing the intrinsic sequential patterns of  
435 sleep stages, SleepGPT enhances model generalizability across diverse datasets.

436 The relatively low staging accuracy for N1 sleep observed across all models is con-  
437 sistent with findings in the literature [53]. N1 sleep, being a transitional and highly  
438 variable stage, is notably challenging to classify accurately due to its subtle features  
439 and overlap with both wakefulness and N2 stages. Studies have reported that human

440 scorers also struggle with N1 consistency, often showing significant inter-rater vari-  
441 ability [56]. This inherent ambiguity makes N1 classification particularly difficult for  
442 automated models, which rely on training data labeled by human experts. Despite  
443 these challenges, the SleepGPT models achieves consistent improvements across sleep  
444 stages. We anticipate even greater performance improvements as the volume of training  
445 data for SleepGPT increases.

446 In contrast to traditional sleep disorder diagnosis approaches that rely on hand-  
447 crafted features derived from hypnogram analysis (e.g., stage latencies, durations,  
448 and transitions), our proposed hierarchical transformer network (HTN) directly mod-  
449 els and categorizes sleep stage sequences in an end-to-end fashion. This hierarchical  
450 architecture allows the model to capture both local and global contextual informa-  
451 tion within sleep hypnograms, enabling more accurate classification of sleep stage  
452 sequences, especially those with varying lengths, compared to the baseline model. By  
453 initializing the HTN’s local feature extractor with pretrained SleepGPT parameters  
454 and subsequently fine-tuning it, we can extract highly informative features for sleep  
455 disorder diagnosis. Notably, the HTN effectively addresses the challenge of subject-  
456 level sleep disorder diagnosis in weakly supervised learning scenarios, where only  
457 session-level labels are available and sleep disorder symptoms may not be consis-  
458 tently present throughout the entire sleep session [37]. Leveraging the self-attention  
459 mechanism in its global transformer module, the HTN achieves accurate subject-level  
460 classification and identifies potential biomarkers indicative of specific sleep disorders.  
461 These include, but are not limited to: (1) reduced REM sleep ratio and frequent REM  
462 sleep-to-wake transitions, suggesting insomnia; (2) shortened REM sleep latency and  
463 direct transitions from wakefulness to REM sleep, characteristic of narcolepsy; and (3)  
464 brief REM sleep duration and frequent shifts between deep sleep (N3 and REM) and  
465 wakefulness, signaling other sleep abnormalities. These insights hold promise for devel-  
466 oping novel diagnostic methodologies. Moreover, the HTN’s adaptability allows for its  
467 potential application to other sleep-related brain disorders, such as depression, anxiety,  
468 dementia, and Parkinson’s disease [1, 2], e.g., by replacing sleep disorder labels with  
469 corresponding condition labels. This flexibility is particularly valuable given the fre-  
470 quent comorbidity of sleep disorders with other neurological or psychiatric conditions.  
471 Additionally, information in sleep stage sequences or hypnograms is much simpler  
472 than that in PSG data, which is often noisy and complex. Diagnosis from sleep stage  
473 sequences has the advantage of alleviating inter-subject or inter-cohort heterogeneity.  
474 However, PSG data may also be fused with the sequential features of sleep stages to  
475 further improve the performance of sleep disorder diagnosis.

476 On the CAP dataset, the pretrained HTN model effectively identifies nearly all  
477 abnormal subjects, with only 1.09% of abnormal subjects being erroneously classi-  
478 fied as normal. This high sensitivity is particularly crucial in sleep disorder diagnosis,  
479 where false positives (misclassifying normal as abnormal) are generally preferable to  
480 false negatives, as they lead to further medical investigation, while undetected abnor-  
481 malities could have serious consequences. Moreover, previous literature indicates that  
482 sensitivity and specificity for T1N are 75-90% and 90-98%, respectively [26, 57–59].  
483 The performance achieved by the pretrained HTN model on the MNC dataset is com-  
484 parable to or exceeds these reported values. These results suggest that analyzing a

485 single-night PSG can be as effective as the PSG-MSLT gold standard, which involves  
486 a 24-hour procedure and is expensive. Consequently, our model offers a promising and  
487 cost-effective alternative as a screening tool for T1N, potentially reducing the need  
488 for MSLT by reliably identifying individuals likely to have T1N. This approach could  
489 streamline the pathway for patients requiring further diagnostic evaluation. Further-  
490 more, Stephansen et al. [26] reported a sensitivity of 91% and specificity of 96% for  
491 diagnosing T1N on the test data from the full MNC dataset, with replication set sen-  
492 sitivity and specificity at 93% and 91%. However, while their study utilized the entire  
493 MNC dataset from nine cohorts, our study analyzed only a subset of the MNC dataset  
494 (SSC, DHC, and CNC) due to missing sleep staging labels in the other six cohorts.

495 The strong performance of SleepGPT-based models in sleep staging with wearable  
496 EEG and in disorder identification opens exciting possibilities for real-time, at-home  
497 sleep monitoring. Wearable devices powered by SleepGPT could provide immediate  
498 feedback on sleep quality, identify potential sleep disturbances as they occur, and offer  
499 personalized advice for improving sleep. Such real-time monitoring could be inval-  
500 uable for individuals with chronic sleep disorders, allowing for timely interventions and  
501 adjustments to treatment plans. Furthermore, continuous sleep monitoring could facil-  
502 itate early detection of sleep problems, potentially preventing them from escalating  
503 into more serious health issues.

504 While our experiments demonstrate the effectiveness of SleepGPT, it is important  
505 to acknowledge certain limitations. The SHHS dataset used for pretraining SleepGPT  
506 is relatively small compared to the massive text corpora used to train traditional  
507 GPT models. Expanding the pretraining dataset could further enhance model perfor-  
508 mance. Future research should also explore fine-grained sleep disorder classification by  
509 leveraging larger and more diverse datasets to gain deeper insights into specific sleep  
510 stage patterns and transitions associated with particular disorders. Furthermore, while  
511 hypnograms provide valuable information on sleep macrostructure, they have limited  
512 ability to capture microstructural events like sleep spindles and K-complexes [28]. Inte-  
513 grating additional data modalities, such as high-resolution EEG or other physiological  
514 signals, may enhance the accuracy and granularity of sleep disorder diagnosis. Finally,  
515 further validation of SleepGPT across a broader range of sleep datasets is essential to  
516 corroborate its generalizability and robustness before it could be translated for use in  
517 clinical practice.

518 In summary, this study presents SleepGPT, a novel sleep language model based on  
519 the GPT architecture, for efficient sleep assessment. Extensive evaluation across multi-  
520 ple publicly available sleep datasets as well as fully blinded replications on independent  
521 datasets demonstrate that SleepGPT significantly improves sleep staging accuracy and  
522 exhibits promising efficacy in classifying abnormal sleep patterns. This novel approach  
523 for modeling sleep architecture opens new avenues for sleep data analysis, providing  
524 a path towards automated diagnosis and personalized treatment of sleep disorders.

## 525 Methods

### 526 Datasets

527 This study utilizes three distinct types of datasets: sleep datasets for SleepGPT pre-  
528 training, sleep staging, and sleep disorder diagnosis. A total of six publicly accessible  
529 sleep datasets are employed in the experiments. Table 7 provides a comprehensive  
530 summary of these datasets, and further details are provided below.

**Table 7:** Overview of the involved sleep datasets. **BMI** = body mass index, **AHI** = apnea-hypopnea index.

| Dataset                       | Subjects / Sessions | Recording Duration | Age (AVG±STD) | Sex (% Male) | BMI (AVG±STD) | AHI (AVG±STD) | Health Conditions                                                          |
|-------------------------------|---------------------|--------------------|---------------|--------------|---------------|---------------|----------------------------------------------------------------------------|
| <b>SHHS</b><br>[45, 60]       | 5793 / 5793         | Overnight          | 63.1 ± 11.2   | 47.6         | 28.2 ± 5.1    | 17.9 ± 16.1   | Sleep-disordered breathing, heart diseases, and others                     |
| <b>SleepEDF</b><br>[46, 61]   | 78 / 153            | Around 9h          | 59 ± 22.1     | 46.4         | -             | -             | Healthy subjects                                                           |
| <b>MASS</b><br>[47]           | 200 / 200           | Overnight          | 40.6 ± 19.4   | 48.5         | -             | ≤ 20          | Healthy subjects                                                           |
| <b>Physio2018</b><br>[48, 61] | 994 / 994           | 7.7h               | 55 ± 14.3     | 67.0         | 33 ± 7.8      | 19 ± 14.6     | Sleep disorders, healthy subjects                                          |
| <b>BOAS</b><br>[49]           | 128 / 128           | Overnight          | 42.2 ± 19.0   | 40.6         | 23.8 ± 3.2    | -             | Healthy subjects                                                           |
| <b>CAP</b><br>[50, 61]        | 108 / 108           | 8–10h              | 45.2 ± 19.7   | 61.1         | -             | -             | Sleep disorders (n=92), healthy subjects (n=16)                            |
| <b>ISRUC</b><br>[51]          | 86 / 86             | Overnight          | 49.7 ± 15.7   | 59.4         | -             | -             | Sleep apnea (n=76), healthy subjects (n=10)                                |
| <b>MNC-CNC</b><br>[26, 60]    | 77 / 77             | Overnight          | 28.5 ± 16.9   | 51.3         | 23.2 ± 11.5   | 5.34 ± 1.51   | Type-1 narcolepsy (n=54), healthy subjects (n=23)                          |
| <b>MNC-DHC</b><br>[26, 60]    | 79 / 79             | Overnight          | 33.4 ± 14.8   | 50.0         | 24.8 ± 4.9    | -             | Type-1 narcolepsy (n=21), hypersomnia (n=38), healthy subjects (n=20)      |
| <b>MNC-SSC</b><br>[26, 60]    | 251 / 251           | Overnight          | 45.4 ± 13.8   | 59.4         | 23.9 ± 6.5    | 13.7 ± 0.7    | Type-1 narcolepsy (n=7), hypersomnia (n=5), healthy subjects (n=239)       |
| <b>HANG7</b><br>[52]          | 84 / 84             | 8h                 | 24.5 ± 9.6    | 47.6         | 22.72 ± 3.65  | -             | Type-1 narcolepsy (n=13), other narcolepsy (n=38), healthy subjects (n=33) |

## 531 Datasets for SleepGPT Pretraining

532 Training a transformer-based language model typically requires an extensive text cor-  
533 pus, often encompassing millions or even billions of web pages or documents. However,  
534 a sleep dataset of comparable scale, complete with sleep stage annotations, is not  
535 available. Fortunately, the increasing advancements in sleep medicine research, cou-  
536 pled with the research community’s open data policy, have produced several publicly  
537 accessible sleep datasets with sleep stage annotations. The Sleep Heart Health Study  
538 (SHHS) database, a multi-center cohort study examining the cardiovascular and other  
539 consequences of sleep-disordered breathing [45, 60], is a noteworthy example. This  
540 database comprises two rounds of PSG records: Visit 1 (SHHS-1) and Visit 2 (SHHS-  
541 2). In this work, we use the SHHS-1 cohort, which encompasses 5,793 subjects aged  
542 between 39 and 90 years, to train the SleepGPT model. Notably, to ensure alignment  
543 with the AASM scoring standard [3], we merge the N3 and N4 stages into the N3 stage  
544 while discarding the MOVEMENT and UNKNOWN epochs, as the SHHS-1 database  
545 was manually scored following the R&K guidelines [62].

## 546 Datasets for Sleep Staging

547 The proposed SleepGPT model’s performance on sleep staging tasks is evaluated with  
548 two widely used sleep datasets, namely, the Sleep-EDF and the Montreal Archive of  
549 Sleep Studies (MASS). The Physio2018 dataset serves as a benchmark to evaluate the  
550 generalization performance of SleepGPT in enhancing sleep staging. Table 8 provides  
551 a detailed summary of these datasets.

**Table 8:** Number of subjects, EEG channels, and sleep stage distribution of the sleep staging datasets

| Datasets   | Subjects | EEG channel | W      | N1     | N2     | N3     | REM    | Total  |
|------------|----------|-------------|--------|--------|--------|--------|--------|--------|
| SleepEDF   | 78       | Fpz-Cz      | 69824  | 21522  | 69132  | 13039  | 25835  | 199352 |
| MASS       | 200      | C4-A1/C3-A2 | 31184  | 19359  | 107930 | 30383  | 40184  | 229040 |
| Physio2018 | 994      | C3-A2       | 157945 | 136978 | 377870 | 102592 | 116877 | 892262 |
| BOAS       | 128      | C4/AF7      | 19137  | 4462   | 72181  | 5225   | 18754  | 120095 |

552 **SleepEDF Dataset:** We utilize the 2018 version of the SleepEDF Expanded  
553 dataset [46, 61]. This collection comprises data from 78 healthy Caucasian subjects  
554 aged 25 to 101 years. Each subject contributed two consecutive day-night PSG record-  
555 ings, except for subjects 13, 36, and 52, where one recording was lost due to device  
556 failure. Consequently, the dataset contains 153 overnight recordings. Sleep experts  
557 manually scored the epochs based on the R&K standard [62], assigning each 30-second  
558 PSG epoch to one of eight categories: {W, N1, N2, N3, N4, REM, MOVEMENT,  
559 UNKNOWN}. To align with convention, the N3 and N4 stages were merged into the  
560 N3 stage, while the MOVEMENT and UNKNOWN epochs were excluded. Notably,

561 the SleepEDF-20 dataset was not assessed because it is a subset of this particular  
562 version of SleepEDF.

563 **MASS Dataset:** Derived from different hospital-based sleep laboratories, the  
564 MASS database comprises whole-night recordings from 200 subjects (97 males and  
565 103 females) aged 18 to 76 years [47]. The annotation process involved sleep experts  
566 adhering to either the AASM standard [3] (for the SS1 and SS3 subsets) or the R&K  
567 standard [62] (for the SS2, SS4, and SS5 subsets). In alignment with the previously  
568 mentioned datasets, we harmonized the R&K annotations with the five sleep stages  
569 {W, N1, N2, N3, REM} according to the AASM standard. Epochs initially spanning  
570 20 seconds were extended to 30 seconds by incorporating the 5-second segments before  
571 and after them.

572 **Physio2018 Dataset:** The PhysioNet 2018 Challenge dataset, also known as the  
573 Physio2018 dataset, comprises 1,985 polysomnographic recordings provided by the  
574 Computational Clinical Neurophysiology Laboratory (CCNL) and the Clinical Data  
575 Animation Center (CDAC) at Massachusetts General Hospital (MGH). This dataset  
576 was used in the 2018 PhysioNet Challenge [48, 61] to detect sleep arousals. We used  
577 the training set for our experiments, which included 944 subjects aged 18 to 90. Sleep  
578 experts manually scored the recordings according to the American Academy of Sleep  
579 Medicine (AASM) guidelines [3], annotating five sleep stages: W, N1, N2, N3, and  
580 REM. This dataset is employed to blindly validate the sleep staging model derived  
581 from the MASS dataset.

582 **BOAS Dataset:** The Bitbrain Open Access Sleep (BOAS) dataset serves to bridge  
583 the gap between gold-standard clinical sleep monitoring and emerging wearable EEG  
584 technologies [49]. This dataset comprises data from 128 nights, during which healthy  
585 participants were simultaneously monitored using both a Brain Quick Plus Evolution  
586 PSG system by Micromed and a Bitbrain wearable EEG headband. The Micromed  
587 PSG system collected EEG signals from electrodes placed at F3, F4, C3, C4, O1,  
588 and O2, following the international 10-20 system. In contrast, the Bitbrain headband  
589 recorded EEG signals from the frontal AF7 and AF8 electrode sites. Both systems  
590 utilized a sampling rate of 256 Hz. Sleep staging was independently annotated by three  
591 expert scorers following the American Academy of Sleep Medicine (AASM) criteria [3],  
592 with a consensus label established by a fourth expert. The BOAS dataset enables the  
593 evaluation of the SleepGPT-based model's ability to achieve sleep staging accuracy  
594 comparable to PSG using wearable EEG data.

## 595 **Datasets for Sleep Disorder Diagnosis**

596 Two sleep-disorder-related datasets were identified for the sleep disorder diagnosis  
597 analysis, including the CAP Sleep Database and the Mignot Nature Communications  
598 (MNC) dataset, which offer both sleep stage annotations and sleep disorder labels.

599 **CAP Dataset:** The CAP Sleep Database is a collection of 108 polysomnographic  
600 recordings contributed by the Sleep Disorders Center of the Ospedale Maggiore of  
601 Parma, Italy [50, 61]. It contains data from seven groups of patients with distinct  
602 sleep disorders, as well as a healthy control group without any medical, neurological,  
603 or psychiatric conditions. The details of these groups are summarized in Table 9. Well-  
604 trained neurologists who are sleep experts manually scored the sleep recordings based

605 on the R&K rules, categorizing the epochs into sleep stages 1-4, wake, REM sleep,  
606 and movement artifacts. To adhere to the AASM standard, we harmonized the R&K  
607 annotations, obtaining five sleep stages: {W, N1, N2, N3, REM}. Notably, the CAP  
608 Sleep Database has been widely used in numerous studies focusing on sleep disorder  
609 diagnosis.

**Table 9:** Sleep disorder groups in the CAP Sleep Database.

| Sleep disorder                         | No. of subjects |
|----------------------------------------|-----------------|
| Bruxism (BRUX)                         | 2               |
| Sleep-disordered breathing (SBD)       | 4               |
| Insomnia (INS)                         | 9               |
| Narcolepsy (NARCO)                     | 5               |
| Nocturnal frontal lobe epilepsy (NFLE) | 40              |
| Periodic leg movements (PLMs)          | 10              |
| REM behavior disorder (RBD)            | 22              |
| No pathology (N)                       | 16              |

610 Note that the CAP Sleep Database is inherently imbalanced. Several groups con-  
611 tain an extremely limited number of subjects. For instance, the BRUX and SBD groups  
612 consisted of only 2 and 3 subjects, respectively. To facilitate subject-level diagnoses,  
613 we conducted binary classification experiments on the CAP Sleep Database, specif-  
614 ically distinguishing abnormal from normal cases. Furthermore, after incorporating  
615 the first-session data of 78 subjects (excluding subjects 36 and 52, who had only one  
616 session available) from the SleepEDF Expanded database into the normal group, the  
617 comprehensive dataset included 186 subjects, 94 of whom were labeled as normal and  
618 92 of whom were labeled as abnormal.

619 **ISRUC Dataset:** The ISRUC-Sleep dataset [51] contains full-night PSG record-  
620 ings, each approximately eight hours in duration, collected at the Sleep Medicine  
621 Centre of Coimbra University Hospital (CHUC) between 2009 and 2013. Data were  
622 acquired non-invasively using a SomnoStar Pro multi-channel system, with sensors  
623 placed according to the international 10–20 standard. The dataset includes recordings  
624 from both healthy adults and subjects with sleep disorders under medication, divided  
625 into three groups: 1) 100 subjects with one session each; 2) 8 subjects with two sessions  
626 for longitudinal studies; 3) 10 healthy subjects with one session, used for comparison  
627 with sleep disorder patients. Among the dataset, 76 obstructive sleep apnea (OSA)  
628 patients and 10 healthy controls are included to blindly validate the sleep disorder  
629 diagnosis model derived from the CAP dataset.

630 **MNC Dataset:** The Mignot Nature Communications (MNC) dataset comprises  
631 raw polysomnography data collected from an automated sleep staging project utilizing  
632 neural networks [26, 60]. It encompasses data from ten distinct cohorts recorded at  
633 twelve sleep centers across three continents: the patient-based Stanford Sleep Cohort  
634 (SSC), the population-based Wisconsin Sleep Cohort (WSC), the patient-based Inter-  
635 scorer Reliability Cohort (IS-RC), the Jazz Clinical Trial Sample (JCTS), the patient-  
636 based Korean Hypersomnia Cohort (KHC), the patient-based Austrian Hypersomnia

637 Cohort (AHC), the patient-based Italian Hypersomnia Cohort (IHC), the patient-  
638 based Danish Hypersomnia Cohort (DHC), the patient-based French Hypersomnia  
639 Cohort (FHC), and the patient-based Chinese Narcolepsy Cohort (CNC). The study  
640 received approval from institutional review boards, and informed consent was obtained  
641 from all participants. Trained sleep-scoring technicians manually annotated all sleep  
642 studies according to the AASM Scoring Manual [3]. Additionally, the subjects were  
643 divided into the Type-1 narcolepsy (T1N; with either low CSF hypocretin-1 levels or  
644 clear cataplexy), other hypersomnia (OHS), or non-narcolepsy control (NNC) group  
645 based on multiple sleep latency test (MSLT) results, cataplexy symptoms, and human  
646 leukocyte antigen (HLA) results (if available). Further information about the MNC  
647 dataset can be found in [26].

648 However, as diagnostic results were only available for the SSC, DHC, and CNC  
649 cohorts, we exclusively utilized these three cohorts for the sleep disorder diagnosis task.  
650 The dataset compiled from these cohorts encompassed 407 subjects, among whom 82  
651 were in the T1N group, 43 were in the OHS group, and 282 were in the NNC group  
652 (see Table 10). To facilitate comparison with previous research, we adhered to the  
653 methodology outlined in [26] and conducted binary classification experiments on the  
654 MNC dataset to discriminate T1N subjects from all other subjects, i.e., OHS and  
655 NNC subjects. This dataset is also employed to blindly assess the generalizability of  
656 the sleep disorder diagnosis model derived from the CAP dataset.

**Table 10:** Sleep disorder groups in the MNC dataset.

| Sleep disorder               | No. of subjects |     |     |       |
|------------------------------|-----------------|-----|-----|-------|
|                              | CNC             | DHC | SSC | Total |
| Type-1 narcolepsy (T1N)      | 54              | 21  | 7   | 82    |
| Other hypersomnia (OHS)      | 0               | 38  | 5   | 43    |
| Non-narcolepsy control (NNC) | 23              | 20  | 239 | 282   |
| Total                        | 77              | 79  | 251 | 407   |

657 **HANG7 Dataset:** In the HANG7 dataset [52], 84 participants aged 11 to 57  
658 years (mean age:  $24.5 \pm 9.6$ ), including 44 females and 40 males, were recruited to col-  
659 lect polysomnography recordings at the Affiliated Mental Health Center & Hangzhou  
660 Seventh People’s Hospital, Zhejiang University School of Medicine. The study was  
661 conducted at Zhejiang University with Institutional Review Board approval, and writ-  
662 ten consent was obtained from all participants or their caregivers. PSG recordings  
663 were collected following the AASM sleep standards [3] and manually scored by experi-  
664 enced sleep technicians. Each participant’s PSG recording covered one full night, from  
665 approximately 21:00 to 5:00 the next morning, totaling about 8 hours. Of the 84 partic-  
666 ipants, 13 were diagnosed with T1N (with clear cataplexy), 38 were other narcolepsy,  
667 and 33 were healthy controls. The dataset was used to blindly validate the general-  
668 izability of the sleep disorder diagnosis models derived from the CAP (abnormal vs.  
669 normal) and MNC (T1N vs. others) datasets.



## 670 Problem Formulation

### 671 Sleep Staging as Speech Recognition

672 A general speech recognition system consists of an acoustic model and a language  
673 model. The acoustic model  $\mathcal{M}_1$  predicts the most likely word sequence given speech  
674 audio features  $X$  via

$$P(Y; \mathcal{M}_1) = P(Y|X; \mathcal{M}_1), \quad (1)$$

675 while the language model  $\mathcal{M}_2$  is built based on a large-scale text corpus to capture  
676 the sequential characteristics of the word sequence via

$$P(Y; \mathcal{M}_2) = P(y_1, y_2, \dots, y_T) = \prod_{t=1}^T P(y_t | y_1, y_2, \dots, y_{t-1}). \quad (2)$$

677 The trained language model is then used to rectify the word sequence predicted by  
678 the acoustic model to improve the speech recognition performance as follows [63–65]:

$$\begin{aligned} Y^* &= \arg \max_Y P(Y; \mathcal{M}_1, \mathcal{M}_2) \\ &= \arg \max_Y P(Y|X; \mathcal{M}_1)P(Y; \mathcal{M}_2). \end{aligned} \quad (3)$$

679 In the automated sleep staging process, features are extracted from a sleep data  
680 epoch, and a sleep staging model is then applied to predict the most likely sleep stage  
681 for that epoch. The model, whether it is a traditional machine learning or deep learning  
682 model, is similar to the acoustic model in a speech recognition system. It is designed  
683 and trained on a large-scale sleep dataset to achieve satisfactory prediction accuracy on  
684 unseen sleep epochs. However, due to various factors such as architectural limitations,  
685 training inadequacies, and data scarcity, imperfections in the PSG-based sleep staging  
686 model may occur, leading to inaccurate predictions of sleep stages. The inter-scorer  
687 reliability for sleep stage scoring is reported to be 82.6% on average, which closely  
688 aligns with that achieved by machine learning-based automated staging systems [26].  
689 Given the analogous nature of text and sleep stage sequences, emulating the speech  
690 recognition system paradigm may improve sleep staging performance. This involves  
691 training a sleep language model that can capture the inherent sequential characteristics  
692 of sleep stages to assume a role akin to that of a natural language model (see Fig. S5).

### 693 Sleep Disorder Diagnosis as Text Classification

694 It is believed that sleep architecture, i.e., the distribution of sleep stages, is strongly  
695 related to the quality of sleep. Certain sleep disorders exhibit disrupted sleep architec-  
696 ture and atypical sleep stage transitions. Examples include shortened deep sleep stages  
697 in cases of insomnia, and short REM sleep latency or immediate transitions from wake-  
698 fulness to REM sleep in narcolepsy. An overnight sleep stage sequence has the form  
699  $\{W, \dots, N1, \dots, N2, \dots, N3, \dots, REM, \dots\}$ . Such sequences are plotted as hypno-  
700 grams in Fig. 1 (top-left). They are akin to concise news pieces or textual documents  
701 with a vocabulary of only five words. In turn, the sleep stage sequence encodes the

702 sequential attributes and transitional patterns characterizing the progression between  
703 sleep stages. The integration of a sequential model enables these characteristics to be  
704 identified and described.

705 Hence, a viable approach is to treat sleep disorder diagnosis as a long text classi-  
706 fication task. Here, the trained sleep language model is harnessed to extract features  
707 from the sleep stage sequences (hypnograms), enabling the subsequent classification  
708 of these sequences as associated with a sleep disorder or not. This is an innovative  
709 method for sleep disorder diagnosis using only the sleep stages obtained from either  
710 human experts or automated sleep staging models.

## 711 The SleepGPT model

712 Recently, the success of transformer-based language models (LMs), including bidirec-  
713 tional encoder representations from transformers (BERT) and generative pretrained  
714 transformers (GPT), has been noted across various natural language processing  
715 (NLP) tasks, such as machine translation, question-answering, and text genera-  
716 tion [43, 44, 66]. BERT, which functions as a bidirectional LM, is trained to predict  
717 masked words based on neighboring words and to perform next-sentence prediction.  
718 Conversely, GPT operates as a decoder-only transformer LM, autoregressively pre-  
719 dicting the next character or word based on preceding ones. Both models undergo  
720 self-supervised training on extensive text corpora. The success of ChatGPT has illus-  
721 trated its proficient ability to capture the inherent sequential attributes of natural  
722 language. This ability has been extensively utilized to improve performance in speech  
723 recognition and diverse NLP tasks, such as text classification.

724 Transformers consist of multiple transformer blocks, typically including a multi-  
725 head self-attention layer, a feed-forward layer, and residual and normalization lay-  
726 ers [67]. GPT employs causal attention in its self-attention layer to ensure exclusive  
727 attention to preceding words. This concept has been applied in sequential sleep stag-  
728 ing models that rely on prior sleep epochs for current sleep stage predictions. It has  
729 proven to be especially significant in online sleep staging systems, where only preced-  
730 ing epochs are accessible during the current prediction task. Hence, GPT is selected  
731 to capture the sequential traits of sleep stages. The SleepGPT model adopts the archi-  
732 tecture of the GPT-2 language model developed by OpenAI [43, 44]. As illustrated in  
733 Fig. S4, the main part of the model is composed of a series of  $n$  transformer decoder  
734 blocks, marked by the masked multi-head self-attention layers. Token embedding and  
735 position embedding layers are employed to map the sleep stage tokens into a vec-  
736 tor space and to infuse positional information into each token’s sequence placement,  
737 respectively. The final transformer block’s output is input to a linear layer to obtain  
738 the probability distribution of the next sleep stage.

739 The model undergoes self-supervised training through the autoregressive fore-  
740 cast of the most likely sleep stage based on preceding sleep stages. For each subject  
741 or sleep session, the overnight sleep stage annotations are structured as a long  
742 sequence  $\mathcal{U} = \{u_1, \dots, u_N\}$ , where  $u_i \in \{0, 1, 2, 3, 4\}$  represents the five sleep stages  
743  $\{W, N1, N2, N3, REM\}$  as integers ranging from 0 to 4. Training samples are derived  
744 from the sequence using a sliding window of dimensions  $K$ , passing over the sequence  
745 with a stride of 1, where  $K$  signifies the sample sequence length. Consequently, the

746 overnight stage sequence yields  $N - K + 1$  overlapping instances. The  $(i - 1)$ th instance  
 747 of the  $K$  sleep stages, denoted as  $\mathbf{U}_{i-1} = \{u_{i-K}, \dots, u_{i-1}\}$ , constitutes the input  
 748 and is fed into the model for predicting the target; the target is the  $i$ th instance  
 749  $\mathbf{U}_i = \{u_{i-K+1}, \dots, u_i\}$ :

$$h_0 = \mathbf{U}_{i-1} \mathbf{W}_e + \mathbf{W}_p \quad (4)$$

$$h_l = \text{transformer\_block}(h_{l-1}), \forall l \in [1, L] \quad (5)$$

$$P(\mathbf{U}_i) = \text{softmax}(h_n \mathbf{W}_s^T) \quad (6)$$

750 where  $L$  is the number of transformer layers,  $\mathbf{W}_e$  is the token embedding matrix,  $\mathbf{W}_p$   
 751 is the position embedding matrix, and  $\mathbf{W}_s$  is the weight of the classification head.  
 752 The model is trained with the objective of minimizing the cross-entropy loss, thereby  
 753 reducing the disparity between the predicted sleep stage and the actual ground truth:

$$\mathcal{L}(\mathcal{U}) = - \sum_{i=1} \log P(\mathbf{U}_i | \mathbf{U}_{i-1}; \Theta), \quad (7)$$

754 where  $\Theta$  is the parameter of the GPT sequential model.

## 755 Sleep Staging with SleepGPT

756 Automated sleep staging is an active research topic within the realm of sleep medicine;  
 757 it aims to automate the prediction of sleep stages for individual sleep PSG data epochs,  
 758 typically spanning 30 seconds. Several excellent deep learning models have been pro-  
 759 posed for this purpose. Most of them share a common architecture, comprising a CNN  
 760 to extract intra-epoch features and an RNN to incorporate the contextual informa-  
 761 tion in adjacent PSG data epochs[9, 11–14, 23]. Among cutting-edge sleep staging  
 762 models, XSleepNet[23] employs two network streams to learn from multi-view inputs  
 763 (e.g., both raw signals and time-frequency images) for sleep staging. By adapting the  
 764 contributions of the two views on time to perform joint feature learning during train-  
 765 ing, XSleepNet outperforms the single-view baselines and multi-view baselines with a  
 766 simple fusion strategy. However, while contextual information within PSG signals is  
 767 incorporated into the above deep learning models, they neglect the inherent sequential  
 768 traits and transition patterns within sleep stages.

769 To use the trained SleepGPT model to improve sleep staging performance, we treat  
 770 the sleep staging task as a speech recognition task and follow the pipeline in Fig. S5.  
 771 The sleep staging model (SSM) is used to predict the most likely sleep stage given a  
 772 PSG data epoch or preceding epochs, while the SleepGPT model is used to rectify the  
 773 predicted sleep stage given past stages. That is, the output logits of the SSM  $P_{\text{SSM}}(y)$   
 774 and those of the sleep language model (SLM)  $P_{\text{SLM}}(y)$  are weighted by a factor  $\alpha$  to  
 775 obtain the final sleep stage prediction:

$$P(y) = \alpha P_{\text{SSM}}(y | \mathbf{x}) + (1 - \alpha) P_{\text{SLM}}(y | \mathbf{y}_-), \quad (8)$$

776 where  $\mathbf{x}$  is the set of input data epochs, including the current and preceding epochs  
 777 depending on whether a memory staging model is used, and  $\mathbf{y}_-$  is the set of preceding

778 sleep stages (context). Notably, the hyperparameter  $\alpha$  governs the relative influences  
779 of these two models, ultimately steering the sleep stage prediction toward the highest  
780 probability outcome.

## 781 Sleep Disorder Diagnosis with SleepGPT

782 Sleep disorder diagnosis involves discerning the presence and specific type of sleep dis-  
783 order in an individual. This task is typically conducted either by sleep specialists or by  
784 ML models that leverage PSG data for automated assessment. ML-based approaches  
785 often include PSG data feature extraction, followed by the classification of sleep dis-  
786 orders. However, the high dimensionality of PSG data, coupled with a lack of labeled  
787 instances, makes it challenging to train an ML model with robust generalizability. The  
788 situation is even worse in the case of deep learning models, which commonly demand  
789 an extensive volume of labeled data to achieve optimal model performance.

790 Pretrained language models, such as GPTs trained on expansive text corpora, can  
791 capture the intrinsic sequential characteristics of natural language. These pretrained  
792 sleep language models can function as feature extractors, processing text sequences  
793 to subsequently enable classification. Notably, these pretrained models can be fur-  
794 ther fine-tuned using limited-scale datasets, significantly enhancing the classification  
795 performance. This strategy, referred to as transfer learning, effectively addresses the  
796 challenge of limited sample size, and it has a proven track record of success across  
797 numerous NLP applications.

798 Drawing inspiration from this pretraining and fine-tuning paradigm, we leverage  
799 the pretrained SleepGPT model as a feature extractor. We replace the subsequent stage  
800 prediction layer with a classifier and perform comprehensive fine-tuning to facilitate  
801 sleep disorder classification. Nevertheless, a challenge arises for the SleepGPT model  
802 in handling long sequences: the sequence length limitation. A whole-night (8-hour)  
803 sleep stage sequence comprises 960 time steps, significantly exceeding the sequence  
804 length restriction of the SleepGPT model. We address this by segmenting the overnight  
805 sequence into shorter sections. Initially, the SleepGPT model is employed to extract  
806 local context features from these short sleep stage segments. Subsequently, another  
807 sequential model (a transformer encoder) is used to capture the global contextual fea-  
808 tures from the SleepGPT output [67]. Finally, the resulting global context features  
809 are fed into a classification head to predict sleep disorder labels. The configuration  
810 of the hierarchical transformer network (HTN) is depicted in Fig. S6. This archi-  
811 tecture, which is tailored for lengthy sequence classification, is borrowed from the  
812 hierarchical attention network (HAN) and hierarchical transformers utilized for long  
813 text classification [68, 69].

814 Additionally, to facilitate mini-batch training, we pad the short sleep stage  
815 sequences within a batch to achieve a uniform length. Subsequently, a mask matrix is  
816 employed to exclude the padded values during the computation of attention weights  
817 and the loss calculation. The loss function involves cross-entropy loss, which compares  
818 the predicted sleep disorder labels with the ground truth:

$$\mathcal{U} = \{\mathbf{U}_i\}, \forall i \in [1, N] \quad (9)$$

$$\mathbf{z}_i = \text{SleepGPT}(\mathbf{U}_i) \quad (10)$$

$$\mathbf{V} = \text{transformer\_encoder}(\mathbf{Z}) \quad (11)$$

$$P(\mathcal{U}) = \text{softmax}(\mathbf{W}_c \mathbf{v}_0 + b_c) \quad (12)$$

$$\mathcal{L}(\mathcal{U}) = - \sum_{i=1} \log P(\mathcal{U}; \Phi), \quad (13)$$

819 where  $\mathbf{U}_i$  is the  $i$ th segment, and  $N$  represents the number of segments within a  
820 sleep stage sequence.  $\mathbf{z}_i$  denotes the  $i$ th local feature vector generated by SleepGPT.  
821 Notably,  $\mathbf{Z} = \{\mathbf{z}_0, \dots, \mathbf{z}_N\}$  and  $\mathbf{V} = \{\mathbf{v}_0, \dots, \mathbf{v}_N\}$  denote the input and output  
822 sequences of the transformer encoder, respectively. Here,  $\mathbf{z}_0$  corresponds to the *CLS*  
823 token, while  $\mathbf{v}_0$  represents the global feature vector at the *CLS* token's output position.  
824 The *CLS* token in transformers is a special token added at the beginning of the input  
825 sequence, and its final output serves as a global representation of the entire sequence for  
826 tasks like classification [66, 70]. The parameters of the classification head are denoted  
827 as  $\mathbf{W}_c$  and  $b_c$ , and  $\Phi$  includes the trainable parameters of the entire model.

## 828 Baseline Models

829 To evaluate the efficacy of the SleepGPT model, we utilized two baseline models  
830 for sleep staging tasks: TinySleepNet [12] and XSleepNet [23]. TinySleepNet is a  
831 lightweight architecture integrating a convolutional neural network (CNN) and long  
832 short-term memory (LSTM) components. It extracts local EEG signal features via  
833 the CNN, while the LSTM captures sequential dependencies between sleep epochs  
834 (refer to Fig. S7). Despite its simplicity, TinySleepNet exhibits competitive perfor-  
835 mance across various publicly available sleep datasets. XSleepNet, on the other hand,  
836 is a state-of-the-art sleep staging model that harnesses multi-view inputs, including  
837 raw signals and time-frequency images, to increase sleep staging accuracy. The model  
838 comprises two network streams, each learning from a distinct view, with a fusion  
839 strategy to integrate the contributions of the two views. Additionally, a bidirectional  
840 LSTM is employed to capture temporal dependencies within sleep stage sequences.  
841 XSleepNet has demonstrated superior performance over single-view and multi-view  
842 baselines by employing a simple fusion strategy. Further details regarding the XSleep-  
843 Net model can be found in [23]. However, to eliminate the impact of numerical  
844 precision and device-specific factors, we reimplemented the XSleepNet models using  
845 the PyTorch framework. Experiments were conducted with the reimplemented version  
846 of XSleepNet, referred to as XSleepNet-reimp.

847 In the context of sleep disorder diagnosis based on stage sequences, two types  
848 of models were employed: empirical feature-based XGBoost classifiers and end-to-  
849 end deep neural networks. One XGBoost classifier was trained on statistical features  
850 extracted from the sleep stage sequences, including the percentage of each sleep stage,  
851 stage latency, stage duration, sleep efficiency, and transition probabilities between  
852 stages (as detailed in [53]). Another XGBoost classifier was trained on hypnosity  
853 features, which represent the classification probabilities for each sleep stage, introduced  
854 by [26]. On the other hand, deep neural network models were trained directly on the  
855 raw sleep stage sequences. As a baseline end-to-end model (BaseNet), we employed the  
856 widely recognized fastText model for feasibility validation [71]. The fastText model

857 consists of an embedding layer followed by averaging operations and a hidden layer  
858 (Fig. S8). While extremely simple, it often matches the accuracy of deep learning  
859 classifiers and is significantly faster in both training and evaluation.

## 860 Experimental Setup

### 861 Settings for SleepGPT pretraining

862 Importantly, the sleep stage vocabulary consists of only five "words", namely {W, N1,  
863 N2, N3, REM}, so it is significantly smaller than the vocabulary of a typical language  
864 model. Consequently, the size of SleepGPT is much smaller than the original GPT  
865 model. Specifically, the SleepGPT model architecture comprises 3 stacked transformer  
866 blocks, each having 6 attention heads and 48 hidden units. Both the token and position  
867 embeddings have a size of 48. Training is performed on the SHHS dataset for 50 epochs,  
868 utilizing a batch size of 256. The learning rate is set at  $5e-4$ , and the Adam optimizer is  
869 employed, utilizing a cosine learning rate decay schedule. The training is implemented  
870 is done via the PyTorch framework and the HuggingFace Transformers library.

### 871 Settings for sleep staging

872 We adapted the original TinySleepNet and XSleepNet by eliminating the temporal  
873 LSTM layer, allowing them to make predictions based solely on the current EEG  
874 epoch. This exclusion of memory resulted in versions named TinySleepNet-nonseq and  
875 XSleepNet-nonseq. We deployed both TinySleepNet-nonseq and XSleepNet-nonseq  
876 and their original implementations, TinySleepNet and XSleepNet, for a thorough  
877 evaluation of the proposed SleepGPT model. The temporal sequential model has a  
878 sequence length of 15, utilizing the current and preceding 14 epochs to forecast the  
879 current sleep stage. All sleep staging models underwent 200 training epochs, utilizing  
880 a batch size of 256. A learning rate of  $5e-4$  was employed along with the Adam opti-  
881 mizer, implementing a cosine learning rate decay schedule. To determine a reasonable  
882 value for the weight  $\alpha$  in Eq. 8, which influences the balance between the sleep staging  
883 model and the SleepGPT model, a grid search was conducted on an independent val-  
884 idation set. The evaluation of model performance involved ten-fold cross-validation,  
885 conducted at either the subject or session level, aligning with the evaluation proto-  
886 cols commonly adopted in related research. Independent validation experiments were  
887 also conducted to assess the generalization performance of the models across different  
888 sleep datasets.

### 889 Settings for sleep disorder diagnosis

890 Given that a sleep cycle typically spans approximately 90 minutes, multiple SleepGPT  
891 models were trained, each with distinct context sizes: 30, 60, 120, and 180 epochs  
892 (equal to 15, 30, 60, and 90 minutes, respectively). The context size directly influences  
893 the segment lengths of the sleep stage sequences used in our sleep disorder diagnosis  
894 HTN model. Despite the use of larger local context sizes, noteworthy performance  
895 gains were not observed. Instead, these larger sizes led to increased training time  
896 and memory utilization. Consequently, a context size of 60 epochs (30 minutes) was

897 selected for both the SleepGPT model and the HTN model. In the HTN architecture,  
898 the local feature extraction SleepGPT module adopts a configuration identical to that  
899 of the pretraining phase, facilitating the direct application of the pretrained model.  
900 For global feature extraction through the transformer encoder, one transformer block  
901 consisting of 6 attention heads and 48 hidden units is sufficient. Moreover, to validate  
902 the efficacy of pretraining, we trained the hierarchical sleep disorder diagnosis model  
903 entirely from scratch. Additionally, we evaluated the previously mentioned fastText  
904 model as a baseline in the context of the sleep disorder diagnosis task, facilitating  
905 direct comparison. Training was conducted for 100 epochs on both the CAP and  
906 MNC datasets, employing a batch size of 16. The learning rate was set at 5e-5, with  
907 optimization performed by the Adam optimizer with a cosine learning rate decay  
908 schedule. Furthermore, following previous protocols, both ten-fold cross-validation and  
909 independent-sample test were utilized to evaluate model performance.

910 **Reporting Summary.** Further information on research design is available in the  
911 Nature Research Reporting Summary linked to this article.

## 912 Data availability

913 The SHHS [45] and MNC [26] datasets are provided by the National  
914 Sleep Research Resource with appropriate deidentification. Permission  
915 and access for these datasets can be obtained via the online portal:  
916 <https://www.sleepdata.org>. The SleepEDF [46], Physio2018 [48], and CAP [50]  
917 datasets are available from PhysioNet at [https://physionet.org/content/sleep-](https://physionet.org/content/sleep-edfx/1.0.0/)  
918 [edfx/1.0.0/](https://physionet.org/content/challenge-2018/1.0.0/), <https://physionet.org/content/challenge-2018/1.0.0/>, and  
919 <https://physionet.org/content/capspdb/1.0.0/>, respectively. The MASS [47]  
920 dataset is available at <http://ceams-carsm.ca/mass/>. The BOAS [49] dataset  
921 can be accessed at [OpenNeuro](https://openneuro.org). The ISRUC [51] dataset can be accessed at  
922 <https://sleeptight.isr.uc.pt/>. Access to the HANG7 dataset is governed by data-use  
923 agreements, and it is therefore not publicly available.

## 924 Code availability

925 The models and source codes for reproducing the results reported in this paper can  
926 be accessed at <https://github.com/yuty2009/sleepgpt>.

## 927 Acknowledgements

928 This work was supported in part by STI2030-Major Projects under Grant  
929 2022ZD0211700, the National Natural Science Foundation of China under Grant  
930 62376098, 62276102, and U22A20293, and Guangdong Basic and Applied Basic  
931 Research Foundation 2024A1515011983.

## 932 Author contributions

933 T.Y. contributed to the development of methods, the analysis and interpretation of the  
934 data, and the drafting of the manuscript. Z.G. contributed to the development of meth-  
935 ods, the analysis and interpretation of the data, and the drafting of the manuscript.  
936 R.H., F.W., M.L., J.Y., Z.Y., J.Z., Y.X., H.J., W.L., G.D., Z.G., Y.W, J.L., Y.Z., and  
937 M.J. contributed to the analysis and interpretation of the data. Y.L. contributed to the  
938 analysis and interpretation of the data, and the drafting of the manuscript. J.X. con-  
939 tributed to the development of methods, the analysis and interpretation of the data,  
940 and the drafting of the manuscript. W.W. contributed to the development of meth-  
941 ods, the analysis and interpretation of the data, and the drafting of the manuscript.  
942 All authors reviewed the manuscript.

## 943 Competing interests

944 W.W. reports equity from Alto Neuroscience. None of the other authors has financial  
945 disclosures to report.

## 946 Additional information

947 Additional study and data information is contained in the supplementary material.

## 948 References

- 949 [1] Mahowald, M.W., Schenck, C.H.: Insights from studying human sleep disorders.  
950 *Nature* **437**(7063), 1279–85 (2005) <https://doi.org/10.1038/nature04287>
- 951 [2] Zheng, N.S., Annis, J., Master, H., Han, L., Gleichauf, K., Ching, J.H., Nasser, M.,  
952 Coleman, P., Desine, S., Ruderfer, D.M., Hernandez, J., Schneider, L.D., Brittain,  
953 E.L.: Sleep patterns and risk of chronic disease as measured by long-term moni-  
954 toring with commercial wearable devices in the all of us research program. *Nature*  
955 *Medicine* **30**(9), 2648–2656 (2024) <https://doi.org/10.1038/s41591-024-03155-8>
- 956 [3] Iber, C., Ancoli-Israel, S., Chesson, A.L., Quan, S.: The AASM manual for  
957 the scoring of sleep and associated events: Rules, terminology and technical  
958 specifications. American Academy of Sleep Medicine (2007)
- 959 [4] MacLean, A.W., Lue, F., Moldofksy, H.: The reliability of visual scoring of alpha  
960 eeg activity during sleep. *Sleep* **18**(7), 565–9 (1995)
- 961 [5] Danker-Hopfe, H., Anderer, P., Zeitlhofer, J., Boeck, M., Dorn, H., Gruber, G.,  
962 Heller, E., Loretz, E., Moser, D., Parapatics, S., Saletu, B., Schmidt, A., Dorffner,  
963 G.: Interrater reliability for sleep scoring according to the rechtschaffen & kales  
964 and the new aasm standard. *J. Sleep Res.* **18**(1), 74–84 (2009) <https://doi.org/10.1111/j.1365-2869.2008.00700.x>  
965



- 966 [6] Rosenberg, R.S., Van Hout, S.: The american academy of sleep medicine inter-  
967 scorer reliability program: sleep stage scoring. *J. Clin. Sleep Med.* **9**(1), 81–7  
968 (2013) <https://doi.org/10.5664/jcsm.2350>
- 969 [7] Alickovic, E., Subasi, A.: Ensemble svm method for automatic sleep stage  
970 classification. *IEEE Transactions on Instrumentation and Measurement* **67**(6),  
971 1258–1265 (2018) <https://doi.org/10.1109/TIM.2018.2799059>
- 972 [8] Li, X., Cui, L., Tao, S., Chen, J., Zhang, X., Zhang, G.-Q.: HyCLASSS: A  
973 hybrid classifier for automatic sleep stage scoring. *IEEE Journal of Biomed-  
974 ical and Health Informatics* **22**(2), 375–385 (2018) [https://doi.org/10.1109/JBHI.  
975 2017.2668993](https://doi.org/10.1109/JBHI.2017.2668993)
- 976 [9] Supratak, A., Dong, H., Wu, C., Guo, Y.: DeepSleepNet: A model for automatic  
977 sleep stage scoring based on raw single-channel eeg. *IEEE Trans. Neural Syst.  
978 Rehabil. Eng.* **25**(11), 1998–2008 (2017) [https://doi.org/10.1109/TNSRE.2017.  
979 2721116](https://doi.org/10.1109/TNSRE.2017.2721116)
- 980 [10] Memar, P., Faradji, F.: A novel multi-class eeg-based sleep stage classification  
981 system. *IEEE Trans. Neural Syst. Rehabil. Eng.* **26**(1), 84–95 (2018) [https://doi.  
982 org/10.1109/TNSRE.2017.2776149](https://doi.org/10.1109/TNSRE.2017.2776149)
- 983 [11] Mousavi, S., Afghah, F., Acharya, U.R.: SleepEEGNet: Automated sleep stage  
984 scoring with sequence to sequence deep learning approach. *PLoS One* **14**(5),  
985 0216456 (2019) <https://doi.org/10.1371/journal.pone.0216456>
- 986 [12] Supratak, A., Guo, Y.: TinySleepNet: An efficient deep learning model for sleep  
987 stage scoring based on raw single-channel eeg. In: *The 42nd Annual International  
988 Conference of the IEEE Engineering in Medicine & Biology Society (EMBC)*, pp.  
989 641–644 (2020). <https://doi.org/10.1109/EMBC44109.2020.9176741>
- 990 [13] Phan, H., Andreotti, F., Cooray, N., Chen, O.Y., De Vos, M.: Joint classification  
991 and prediction CNN framework for automatic sleep stage classification. *IEEE  
992 Trans. Biomed. Eng.* **66**(5), 1285–1296 (2019) [https://doi.org/10.1109/TBME.  
993 2018.2872652](https://doi.org/10.1109/TBME.2018.2872652)
- 994 [14] Phan, H., Andreotti, F., Cooray, N., Chen, O.Y., De Vos, M.: SeqSleepNet: End-  
995 to-end hierarchical recurrent neural network for sequence-to-sequence automatic  
996 sleep staging. *IEEE Trans. Neural Syst. Rehabil. Eng.* **27**(3), 400–410 (2019)  
997 <https://doi.org/10.1109/TNSRE.2019.2896659>
- 998 [15] Phan, H., Lorenzen, K.P., Heremans, E., Chén, O.Y., Tran, M.C., Koch, P.,  
999 Mertins, A., Baumert, M., Mikkelsen, K.B., De Vos, M.: L-SeqSleepNet: Whole-  
1000 cycle long sequence modeling for automatic sleep staging. *IEEE Journal of  
1001 Biomedical and Health Informatics* **27**(10), 4748–4757 (2023) [https://doi.org/10.  
1002 1109/JBHI.2023.3303197](https://doi.org/10.1109/JBHI.2023.3303197)

- 1003 [16] Phan, H., Mikkelsen, K., Chén, O.Y., Koch, P., Mertins, A., De Vos, M.:  
1004 SleepTransformer: Automatic sleep staging with interpretability and uncertainty  
1005 quantification. *IEEE Transactions on Biomedical Engineering* **69**(8), 2456–2467  
1006 (2022) <https://doi.org/10.1109/TBME.2022.3147187>
- 1007 [17] Dai, Y., Li, X., Liang, S., Wang, L., Duan, Q., Yang, H., Zhang, C., Chen, X.,  
1008 Li, L., Li, X., Liao, X.: MultiChannelSleepNet: A transformer-based model for  
1009 automatic sleep stage classification with psg. *IEEE Journal of Biomedical and*  
1010 *Health Informatics* **27**(9), 4204–4215 (2023) [https://doi.org/10.1109/JBHI.2023.](https://doi.org/10.1109/JBHI.2023.3284160)  
1011 [3284160](https://doi.org/10.1109/JBHI.2023.3284160)
- 1012 [18] Dong, H., Supratak, A., Pan, W., Wu, C., Matthews, P.M., Guo, Y.: Mixed neural  
1013 network approach for temporal sleep stage classification. *IEEE Trans. Neural*  
1014 *Syst. Rehabil. Eng.* **26**(2), 324–333 (2018) [https://doi.org/10.1109/TNSRE.2017.](https://doi.org/10.1109/TNSRE.2017.2733220)  
1015 [2733220](https://doi.org/10.1109/TNSRE.2017.2733220)
- 1016 [19] Perslev, M., Jensen, M.H., Darkner, S., Jennum, P.J., Igel, C.: U-Time: A Fully  
1017 Convolutional Network for Time Series Segmentation Applied to Sleep Staging.  
1018 Curran Associates Inc., Red Hook, NY, USA (2019)
- 1019 [20] Eldele, E., Chen, Z., Liu, C., Wu, M., Kwoh, C.K., Li, X., Guan, C.: An attention-  
1020 based deep learning approach for sleep stage classification with single-channel  
1021 eeg. *IEEE Trans. Neural Syst. Rehabil. Eng.* **29**, 809–818 (2021) [https://doi.org/](https://doi.org/10.1109/TNSRE.2021.3076234)  
1022 [10.1109/TNSRE.2021.3076234](https://doi.org/10.1109/TNSRE.2021.3076234)
- 1023 [21] Perslev, M., Darkner, S., Kempfner, L., Nikolic, M., Jennum, P.J., Igel, C.: U-  
1024 Sleep: resilient high-frequency sleep staging. *npj Digital Medicine* **4**(1), 72 (2021)  
1025 <https://doi.org/10.1038/s41746-021-00440-5>
- 1026 [22] Jia, Z., Lin, Y., Wang, J., Ning, X., He, Y., Zhou, R., Zhou, Y., Lehman, L.-  
1027 w.H.: Multi-view spatial-temporal graph convolutional networks with domain  
1028 generalization for sleep stage classification. *IEEE Transactions on Neural Systems*  
1029 *and Rehabilitation Engineering* **29**, 1977–1986 (2021) [https://doi.org/10.1109/](https://doi.org/10.1109/TNSRE.2021.3110665)  
1030 [TNSRE.2021.3110665](https://doi.org/10.1109/TNSRE.2021.3110665)
- 1031 [23] Phan, H., Chen, O.Y., Tran, M.C., Koch, P., Mertins, A., De Vos, M.: XSleepNet:  
1032 Multi-view sequential model for automatic sleep staging. *IEEE Trans. Pattern*  
1033 *Anal. Mach. Intell.* **44**(9), 5903–5915 (2022) [https://doi.org/10.1109/TPAMI.](https://doi.org/10.1109/TPAMI.2021.3070057)  
1034 [2021.3070057](https://doi.org/10.1109/TPAMI.2021.3070057)
- 1035 [24] Seo, H., Back, S., Lee, S., Park, D., Kim, T., Lee, K.: Intra- and inter-epoch  
1036 temporal context network (IITNet) using sub-epoch features for automatic sleep  
1037 scoring on raw single-channel eeg. *Biomedical Signal Processing and Control* **61**,  
1038 102037 (2020) <https://doi.org/10.1016/j.bspc.2020.102037>
- 1039 [25] Zhou, W., Zhu, H., Shen, N., Chen, H., Fu, C., Yu, H., Shu, F., Chen, C.,

- 1040 Chen, W.: A lightweight segmented attention network for sleep staging by fus-  
1041 sing local characteristics and adjacent information. *IEEE Transactions on Neural*  
1042 *Systems and Rehabilitation Engineering* **31**, 238–247 (2023) [https://doi.org/10.](https://doi.org/10.1109/TNSRE.2022.3220372)  
1043 [1109/TNSRE.2022.3220372](https://doi.org/10.1109/TNSRE.2022.3220372)
- 1044 [26] Stephansen, J.B., Olesen, A.N., Olsen, M., Ambati, A., Leary, E.B., Moore, H.E.,  
1045 Carrillo, O., Lin, L., Han, F., Yan, H., Sun, Y.L., Dauvilliers, Y., Scholz, S.,  
1046 Barateau, L., Hogl, B., Stefani, A., Hong, S.C., Kim, T.W., Pizza, F., Plazzi,  
1047 G., Vandi, S., Antelmi, E., Perrin, D., Kuna, S.T., Schweitzer, P.K., Kushida,  
1048 C., Peppard, P.E., Sorensen, H.B.D., Jennum, P., Mignot, E.: Neural network  
1049 analysis of sleep stages enables efficient diagnosis of narcolepsy. *Nat. Commun.*  
1050 **9**(1), 5229 (2018) <https://doi.org/10.1038/s41467-018-07229-3>
- 1051 [27] Association, A.P.: *Diagnostic and Statistical Manual of Mental Disorders, Fifth*  
1052 *Edition, Text Revision (DSM-5-TR)*. American Psychiatric Publishing, Washing-  
1053 ton, DC, USA (2022)
- 1054 [28] Wikipedia: Hypnogram. <https://en.wikipedia.org/wiki/Hypnogram> (2023)
- 1055 [29] Thachayani, M., Loganayagi, M.: Artificial intelligence based classifier for sleep  
1056 disorder detec-tion using eeg-bci data. *Int. J. Comp. Sci. Trends. Technol.* **9**  
1057 (2021)
- 1058 [30] Sharma, M., Dhiman, H.S., Acharya, U.R.: Automatic identification of insomnia  
1059 using optimal antisymmetric biorthogonal wavelet filter bank with eeg signals.  
1060 *Comput Biol Med* **131**, 104246 (2021) [https://doi.org/10.1016/j.compbimed.](https://doi.org/10.1016/j.compbimed.2021.104246)  
1061 [2021.104246](https://doi.org/10.1016/j.compbimed.2021.104246)
- 1062 [31] Dimitriadis, S.I., Salis, C.I., Liparas, D.: An automatic sleep disorder detection  
1063 based on eeg cross-frequency coupling and random forest model. *J. Neural Eng.*  
1064 **18**(4) (2021) <https://doi.org/10.1088/1741-2552/abf773>
- 1065 [32] Phyo, J., Ko, W., Jeon, E., Suk, H.-I.: TransSleep: Transitioning-aware attention-  
1066 based deep neural network for sleep staging. *IEEE Transactions on Cybernetics*  
1067 **53**(7), 4500–4510 (2023) <https://doi.org/10.1109/TCYB.2022.3198997>
- 1068 [33] Phan, H., Mikkelsen, K.: Automatic sleep staging of eeg signals: recent devel-  
1069 opment, challenges, and future directions. *Physiol. Meas.* **43**(4) (2022) [https:](https://doi.org/10.1088/1361-6579/ac6049)  
1070 [//doi.org/10.1088/1361-6579/ac6049](https://doi.org/10.1088/1361-6579/ac6049)
- 1071 [34] Liang, S.-F., Kuo, C.-E., Hu, Y.-H., Cheng, Y.-S.: A rule-based automatic sleep  
1072 staging method. *Journal of Neuroscience Methods* **205**(1), 169–176 (2012) [https:](https://doi.org/10.1016/j.jneumeth.2011.12.022)  
1073 [//doi.org/10.1016/j.jneumeth.2011.12.022](https://doi.org/10.1016/j.jneumeth.2011.12.022)
- 1074 [35] Malafeev, A., Laptev, D., Bauer, S., Omlin, X., Wierzbicka, A., Wichniak, A.,  
1075 Jernajczyk, W., Riener, R., Buhmann, J., Achermann, P.: Automatic human sleep  
1076 stage scoring using deep neural networks. *Frontiers in Neuroscience* **12** (2018)

- 1077 [36] Bianchi, M.T., Cash, S.S., Mietus, J., Peng, C.-K., Thomas, R.: Obstructive sleep  
1078 apnea alters sleep stage transition dynamics. *PLOS ONE* **5**(6), 1–12 (2010) <https://doi.org/10.1371/journal.pone.0011356>  
1079
- 1080 [37] Xu, S., Faust, O., Seoni, S., Chakraborty, S., Barua, P.D., Loh, H.W., Elphick,  
1081 H., Molinari, F., Acharya, U.R.: A review of automated sleep disorder detection.  
1082 *Comput. Biol. Med.* **150**, 106100 (2022) [https://doi.org/10.1016/j.combiomed.  
1083 2022.106100](https://doi.org/10.1016/j.combiomed.2022.106100)
- 1084 [38] Yang, F., Wang, W., Wang, F., Fang, Y., Tang, D., Huang, J., Lu, H., Yao, J.:  
1085 scBERT as a large-scale pretrained deep language model for cell type annotation  
1086 of single-cell rna-seq data. *Nature Machine Intelligence* **4**(10), 852–866 (2022)  
1087 <https://doi.org/10.1038/s42256-022-00534-z>
- 1088 [39] Born, J., Manica, M.: Regression transformer enables concurrent sequence  
1089 regression and generation for molecular language modelling. *Nature Machine  
1090 Intelligence* **5**(4), 432–444 (2023) <https://doi.org/10.1038/s42256-023-00639-z>
- 1091 [40] Hie, B., Zhong, E.D., Berger, B., Bryson, B.: Learning the language of viral evo-  
1092 lution and escape. *Science* **371**(6526), 284–288 (2021) [https://doi.org/10.1126/  
1093 science.abd7331](https://doi.org/10.1126/science.abd7331)
- 1094 [41] Lin, Z., Akin, H., Rao, R., Hie, B., Zhu, Z., Lu, W., Smetanin, N., Verkuil, R.,  
1095 Kabeli, O., Shmueli, Y., Santos Costa, A., Fazel-Zarandi, M., Sercu, T., Candido,  
1096 S., Rives, A.: Evolutionary-scale prediction of atomic-level protein structure with  
1097 a language model. *Science* **379**(6637), 1123–1130 (2023) [https://doi.org/10.1126/  
1098 science.ade2574](https://doi.org/10.1126/science.ade2574)
- 1099 [42] Elnaggar, A., Heinzinger, M., Dallago, C., Rehawi, G., Wang, Y., Jones, L., Gibbs,  
1100 T., Feher, T., Angerer, C., Steinegger, M., Bhowmik, D., Rost, B.: ProtTrans:  
1101 Toward understanding the language of life through self-supervised learning. *IEEE  
1102 Transactions on Pattern Analysis and Machine Intelligence* **44**(10), 7112–7127  
1103 (2022) <https://doi.org/10.1109/TPAMI.2021.3095381>
- 1104 [43] Radford, A., Narasimhan, K., Salimans, T., Sutskever, I.: Improving language  
1105 understanding with unsupervised learning (2018)
- 1106 [44] Radford, A., Wu, J., Child, R., Luan, D., Amodei, D., Sutskever, I., *et al.*:  
1107 Language models are unsupervised multitask learners. *OpenAI blog* **1**(8), 9  
1108 (2019)
- 1109 [45] Quan, S.F., Howard, B.V., Iber, C., Kiley, J.P., Nieto, F.J., O’Connor, G.T.,  
1110 Rapoport, D.M., Redline, S., Robbins, J., Samet, J.M., Wahl, P.W.: The Sleep  
1111 Heart Health Study: Design, Rationale, and Methods. *Sleep* **20**(12), 1077–1085  
1112 (1997) <https://doi.org/10.1093/sleep/20.12.1077>
- 1113 [46] Kemp, B., Zwinderman, A.H., Tuk, B., Kamphuisen, H.A.C., Obery, J.J.L.:

- 1114 Analysis of a sleep-dependent neuronal feedback loop: the slow-wave microconti-  
1115 nuity of the eeg. *IEEE Transactions on Biomedical Engineering* **47**(9), 1185–1194  
1116 (2000) <https://doi.org/10.1109/10.867928>
- 1117 [47] O’Reilly, C., Gosselin, N., Carrier, J., Nielsen, T.: Montreal archive of sleep  
1118 studies: an open-access resource for instrument benchmarking and exploratory  
1119 research. *Journal of Sleep Research* **23**(6), 628–635 (2014) <https://doi.org/10.1111/jsr.12169>  
1120
- 1121 [48] Ghassemi, M.M., Moody, B.E., Lehman, L.H., Song, C., Li, Q., Sun, H., Mark,  
1122 R.G., Westover, M.B., Clifford, G.D.: You snooze, you win: the physionet/com-  
1123 puting in cardiology challenge 2018. *Comput Cardiol* (2010) **45** (2018) <https://doi.org/10.22489/cinc.2018.049>  
1124
- 1125 [49] López-Larraz, E., Sierra-Torralba, M., Clemente, S., Fierro, G., Oriol, D.,  
1126 Mínguez, J., Montesano, L., Klinzing, J.G.: "bitbrain open access sleep dataset"  
1127 (2024) <https://doi.org/10.18112/openneuro.ds005555.v1.0.0>
- 1128 [50] Terzano, M.G., Parrino, L., Sherieri, A., Chervin, R., Chokroverty, S., Guillem-  
1129 inault, C., Hirshkowitz, M., Mahowald, M., Moldofsky, H., Rosa, A., Thomas,  
1130 R., Walters, A.: Atlas, rules, and recording techniques for the scoring of cyclic  
1131 alternating pattern (CAP) in human sleep. *Sleep Medicine* **2**(6), 537–553 (2001)  
1132 [https://doi.org/10.1016/S1389-9457\(01\)00149-6](https://doi.org/10.1016/S1389-9457(01)00149-6)
- 1133 [51] Khalighi, S., Sousa, T., Santos, J.M., Nunes, U.: Isruc-sleep: A comprehen-  
1134 sive public dataset for sleep researchers. *Computer Methods and Programs in*  
1135 *Biomedicine* **124**, 180–192 (2016) <https://doi.org/10.1016/j.cmpb.2015.10.013>
- 1136 [52] Wang, J., Zhao, S., Zhou, Y., Jiang, H., Yu, Z., Li, T., Li, S., Pan, G.: Narcolepsy  
1137 diagnosis with sleep stage features using psg recordings. *IEEE Transactions on*  
1138 *Neural Systems and Rehabilitation Engineering* **31**, 3619–3629 (2023) <https://doi.org/10.1109/TNSRE.2023.3312396>  
1139
- 1140 [53] Vallat, R., Walker, M.P.: An open-source, high-performance tool for automated  
1141 sleep staging. *eLife* **10**, 70092 (2021) <https://doi.org/10.7554/eLife.70092>
- 1142 [54] Sokolova, M., Lapalme, G.: A systematic analysis of performance measures for  
1143 classification tasks. *Information Processing & Management* **45**(4), 427–437 (2009)  
1144 <https://doi.org/10.1016/j.ipm.2009.03.002>
- 1145 [55] Cohen, J.: A coefficient of agreement for nominal scales. *Educational*  
1146 *and Psychological Measurement* **20**, 37–46 (1960) <https://doi.org/10.1177/001316446002000104>  
1147
- 1148 [56] Rosenberg, R.S., Van Hout, S.: The american academy of sleep medicine inter-  
1149 scorer reliability program: sleep stage scoring. *Journal of clinical sleep medicine*  
1150 **9**(1), 81–87 (2013)

- 1151 [57] Mignot, E., Lammers, G.J., Ripley, B., Okun, M., Nevsimalova, S., Overeem, S.,  
1152 Vankova, J., Black, J., Harsh, J., Bassetti, C., Schrader, H., Nishino, S.: The Role  
1153 of Cerebrospinal Fluid Hypocretin Measurement in the Diagnosis of Narcolepsy  
1154 and Other Hypersomnias. *Archives of Neurology* **59**(10), 1553–1562 (2002) <https://doi.org/10.1001/archneur.59.10.1553>  
1155
- 1156 [58] Andlauer, O., Moore, I. Hyatt, Hong, S.-C., Dauvilliers, Y., Kanbayashi, T.,  
1157 Nishino, S., Han, F., Silber, M.H., Rico, T., Einen, M., Kornum, B.R., Jennum,  
1158 P., Knudsen, S., Nevsimalova, S., Poli, F., Plazzi, G., Mignot, E.: Predictors of  
1159 Hypocretin (Orexin) Deficiency in Narcolepsy Without Cataplexy. *Sleep* **35**(9),  
1160 1247–1255 (2012) <https://doi.org/10.5665/sleep.2080>
- 1161 [59] Andlauer, O., Moore, I. Hyatt, Jouhier, L., Drake, C., Peppard, P.E., Han,  
1162 F., Hong, S.-C., Poli, F., Plazzi, G., O'Hara, R., Haffen, E., Roth, T., Young,  
1163 T., Mignot, E.: Nocturnal Rapid Eye Movement Sleep Latency for Identifying  
1164 Patients With Narcolepsy/Hypocretin Deficiency. *JAMA Neurology* **70**(7),  
1165 891–902 (2013) <https://doi.org/10.1001/jamaneurol.2013.1589>
- 1166 [60] Zhang, G.-Q., Cui, L., Mueller, R., Tao, S., Kim, M., Rueschman, M., Mariani,  
1167 S., Mobley, D., Redline, S.: The National Sleep Research Resource: towards a  
1168 sleep data commons. *Journal of the American Medical Informatics Association*  
1169 **25**(10), 1351–1358 (2018) <https://doi.org/10.1093/jamia/ocy064>
- 1170 [61] Goldberger, A.L., Amaral, L.A.N., Glass, L., Hausdorff, J.M., Ivanov, P.C., Mark,  
1171 R.G., Mietus, J.E., Moody, G.B., Peng, C.-K., Stanley, H.E.: Physiobank, phys-  
1172 iotoolkit, and physionet. *Circulation* **101**(23), 215–220 (2000) <https://doi.org/10.1161/01.CIR.101.23.e215>  
1173
- 1174 [62] Wolpert, E.A.: A Manual of Standardized Terminology, Techniques and Scoring  
1175 System for Sleep Stages of Human Subjects. *Archives of General Psychiatry* **20**(2),  
1176 246–247 (1969) <https://doi.org/10.1001/archpsyc.1969.01740140118016>
- 1177 [63] Chan, W., Jaitly, N., Le, Q., Vinyals, O.: Listen, attend and spell: A neural  
1178 network for large vocabulary conversational speech recognition. In: 2016 IEEE  
1179 International Conference on Acoustics, Speech and Signal Processing (ICASSP),  
1180 pp. 4960–4964 (2016). <https://doi.org/10.1109/ICASSP.2016.7472621>
- 1181 [64] Rao, K., Sak, H., Prabhavalkar, R.: Exploring architectures, data and units for  
1182 streaming end-to-end speech recognition with RNN-transducer. In: 2017 IEEE  
1183 Automatic Speech Recognition and Understanding Workshop (ASRU), pp. 193–  
1184 199 (2017). <https://doi.org/10.1109/ASRU.2017.8268935>
- 1185 [65] Karita, S., Soplein, N., Watanabe, S., Delcroix, M., Ogawa, A., Nakatani, T.:  
1186 Improving transformer-based end-to-end speech recognition with connection-  
1187 ist temporal classification and language model integration. *Proceedings of the*  
1188 *Annual Conference of the International Speech Communication Association,*  
1189 *INTERSPEECH 2019-September*, 1408–1412 (2019) <https://doi.org/10.21437/>

- 1190 [Interspeech.2019-1938](#) . Publisher Copyright: Copyright © 2019 ISCA; 20th  
1191 Annual Conference of the International Speech Communication Association:  
1192 Crossroads of Speech and Language, INTERSPEECH 2019 ; Conference date:  
1193 15-09-2019 Through 19-09-2019
- 1194 [66] Kenton, J.D.M.-W.C., Toutanova, L.K.: BERT: Pre-training of deep bidirectional  
1195 transformers for language understanding. In: Proceedings of NAACL-HLT, pp.  
1196 4171–4186 (2019)
- 1197 [67] Vaswani, A., Shazeer, N., Parmar, N., Uszkoreit, J., Jones, L., Gomez, A.N.,  
1198 Kaiser, L., Polosukhin, I.: Attention is all you need. In: Advances in Neural  
1199 Information Processing Systems, vol. 30 (2017)
- 1200 [68] Yang, Z., Yang, D., Dyer, C., He, X., Smola, A., Hovy, E.: Hierarchical attention  
1201 networks for document classification. In: Proceedings of the 2016 Conference of  
1202 the North American Chapter of the Association for Computational Linguistics:  
1203 Human Language Technologies, pp. 1480–1489. Association for Computational  
1204 Linguistics, San Diego, California (2016). <https://doi.org/10.18653/v1/N16-1174>  
1205 . <https://aclanthology.org/N16-1174>
- 1206 [69] Pappagari, R., Zelasko, P., Villalba, J., Carmiel, Y., Dehak, N.: Hierarchical  
1207 transformers for long document classification. In: 2019 IEEE Automatic Speech  
1208 Recognition and Understanding Workshop (ASRU), pp. 838–844 (2019). <https://doi.org/10.1109/ASRU46091.2019.9003958>  
1209
- 1210 [70] Dosovitskiy, A., Beyer, L., Kolesnikov, A., Weissenborn, D., Zhai, X., Unterthiner,  
1211 T., Dehghani, M., Minderer, M., Heigold, G., Gelly, S., Uszkoreit, J., Houlsby,  
1212 N.: An image is worth 16x16 words: Transformers for image recognition at  
1213 scale. In: International Conference on Learning Representations (2021). <https://openreview.net/forum?id=YicbFdNTTy>  
1214
- 1215 [71] Joulin, A., Grave, E., Bojanowski, P., Mikolov, T.: Bag of tricks for efficient text  
1216 classification. In: Proceedings of the 15th Conference of the European Chapter of  
1217 the Association for Computational Linguistics: Volume 2, Short Papers, pp. 427–  
1218 431. Association for Computational Linguistics, Valencia, Spain (2017). <https://aclanthology.org/E17-2068>  
1219
